# Supplementary material
Source: PubMed Central journal article supplement (PMC7015776)

## Supplemental Digital Content 5A: Acute Kidney Injury Risk by Weighted Preoperative Risk Score in the

Derivation Set (n = 70,929)

| Preoperative Weighted Risk Score | Number of cases | Cumulative Percent of Cohort (%) | Number of Cases with Postoperative AKI | Observed proportion with Postoperative AKI (%) | Expected probability (%) | Risk Quartile | Number of cases, n (%) | Number of Cases with Postoperative AKI | Observed proportion (%) | Expected probability (%) |
|----------------------------------|-----------------|----------------------------------|----------------------------------------|------------------------------------------------|--------------------------|---------------|------------------------|----------------------------------------|-------------------------|--------------------------|
| 1                                | 3               | 0                                | 0                                      | 0                                              | 0                        | 1             | 14,521 (20.4%)         | 254                                    | 1.7                     | 2.2                      |
| 2                                | 260             | 0.4                              | 1                                      | 0.4                                            | 1.0                      |               |                        |                                        |                         |                          |
| 3                                | 739             | 1.4                              | 4                                      | 0.5                                            | 1.2                      |               |                        |                                        |                         |                          |
| 4                                | 1,245           | 3.2                              | 14                                     | 1.1                                            | 1.4                      |               |                        |                                        |                         |                          |
| 5                                | 2,558           | 6.8                              | 41                                     | 1.6                                            | 1.8                      |               |                        |                                        |                         |                          |
| 6                                | 4,293           | 12.8                             | 69                                     | 1.6                                            | 2.3                      |               |                        |                                        |                         |                          |
| 7                                | 5,423           | 20.5                             | 125                                    | 2.3                                            | 2.8                      |               |                        |                                        |                         |                          |
| 8                                | 6,553           | 29.7                             | 237                                    | 3.6                                            | 3.5                      | 2             | 20,372 (28.7%)         | 935                                    | 4.6                     | 4.5                      |
| 9                                | 6,930           | 39.5                             | 305                                    | 4.4                                            | 4.4                      |               |                        |                                        |                         |                          |
| 10                               | 6,889           | 49.2                             | 393                                    | 5.7                                            | 5.5                      | 3             | 15,255 (21.5%)         | 1,188                                  | 7.8                     | 7.5                      |
| 11                               | 7,687           | 60.0                             | 535                                    | 7.0                                            | 6.7                      |               |                        |                                        |                         |                          |
| 12                               | 7,658           | 70.7                             | 653                                    | 8.6                                            | 8.4                      | 4             | 20,781 (29.3%)         | 3,700                                  | 17.8                    | 17.8                     |
| 13                               | 6,444           | 79.8                             | 677                                    | 10.5                                           | 10.6                     |               |                        |                                        |                         |                          |
| 14                               | 5,065           | 86.9                             | 674                                    | 13.3                                           | 13.1                     |               |                        |                                        |                         |                          |
| 15                               | 3,605           | 92.0                             | 641                                    | 17.8                                           | 16.7                     |               |                        |                                        |                         |                          |
| 16                               | 2,463           | 95.5                             | 583                                    | 23.7                                           | 22.4                     |               |                        |                                        |                         |                          |
| 17                               | 1,516           | 97.6                             | 431                                    | 28.4                                           | 29.0                     |               |                        |                                        |                         |                          |
| 18                               | 883             | 98.9                             | 335                                    | 37.9                                           | 37.9                     |               |                        |                                        |                         |                          |
| 19                               | 482             | 99.5                             | 197                                    | 40.9                                           | 47.1                     |               |                        |                                        |                         |                          |
| 20                               | 208             | 99.8                             | 111                                    | 53.4                                           | 55.9                     |               |                        |                                        |                         |                          |
| 21                               | 80              | 100                              | 37                                     | 46.3                                           | 66.5                     |               |                        |                                        |                         |                          |
| 22                               | 30              | 100                              | 9                                      | 30.0                                           | 74.5                     |               |                        |                                        |                         |                          |
| 23                               | 5               | 100                              | 5                                      | 100                                            | 80.3                     |               |                        |                                        |                         |                          |

**Supplemental Digital Content 5B: Acute Kidney Injury Risk by Weighted Preoperative Risk Score in the**

**Validation Set (n = 36,497)**

| Preoperative Weighted Risk Score | Number of cases | Cumulative Percent of Cohort (%) | Number of Cases with Postoperative AKI | Observed proportion with Postoperative AKI (%) | Expected probability (%) | Risk Quartile | Number of cases, n (%) | Number of Cases with Postoperative AKI | Observed proportion (%) | Expected probability (%) |
|----------------------------------|-----------------|----------------------------------|----------------------------------------|------------------------------------------------|--------------------------|---------------|------------------------|----------------------------------------|-------------------------|--------------------------|
| 1                                | 6               | 0                                | 0                                      | 0                                              | 0                        | 1             | 7,409 (20.3%)          | 159                                    | 2.1                     | 2.5                      |
| 2                                | 112             | 0.3                              | 0                                      | 0                                              | 1.0                      |               |                        |                                        |                         |                          |
| 3                                | 367             | 1.3                              | 3                                      | 0.8                                            | 1.3                      |               |                        |                                        |                         |                          |
| 4                                | 672             | 3.2                              | 8                                      | 1.2                                            | 1.7                      |               |                        |                                        |                         |                          |
| 5                                | 1,289           | 6.7                              | 26                                     | 2.0                                            | 2.0                      |               |                        |                                        |                         |                          |
| 6                                | 2,159           | 12.6                             | 43                                     | 2.0                                            | 2.5                      |               |                        |                                        |                         |                          |
| 7                                | 2,804           | 20.3                             | 79                                     | 2.8                                            | 3.1                      |               |                        |                                        |                         |                          |
| 8                                | 3,410           | 29.6                             | 109                                    | 3.2                                            | 3.7                      | 2             | 10,575 (29.0%)         | 495                                    | 4.7                     | 4.6                      |
| 9                                | 3,544           | 39.4                             | 161                                    | 4.5                                            | 4.6                      |               |                        |                                        |                         |                          |
| 10                               | 3,621           | 49.3                             | 225                                    | 6.2                                            | 5.5                      |               |                        |                                        |                         |                          |
| 11                               | 3,839           | 59.8                             | 285                                    | 7.4                                            | 6.7                      | 3             | 7,721 (21.2%)          | 591                                    | 7.7                     | 7.4                      |
| 12                               | 3,882           | 70.4                             | 306                                    | 7.9                                            | 8.2                      |               |                        |                                        |                         |                          |
| 13                               | 3,365           | 79.7                             | 336                                    | 10.0                                           | 10.4                     | 4             | 10,792 (29.6%)         | 1,872                                  | 17.3                    | 17.3                     |
| 14                               | 2,664           | 86.9                             | 365                                    | 13.7                                           | 12.9                     |               |                        |                                        |                         |                          |
| 15                               | 1,824           | 91.9                             | 306                                    | 16.8                                           | 16.5                     |               |                        |                                        |                         |                          |
| 16                               | 1,240           | 95.3                             | 286                                    | 23.1                                           | 21.7                     |               |                        |                                        |                         |                          |
| 17                               | 810             | 97.6                             | 228                                    | 28.1                                           | 28.3                     |               |                        |                                        |                         |                          |
| 18                               | 464             | 98.8                             | 163                                    | 35.1                                           | 35.5                     |               |                        |                                        |                         |                          |
| 19                               | 247             | 99.5                             | 110                                    | 44.5                                           | 44.9                     |               |                        |                                        |                         |                          |
| 20                               | 104             | 99.8                             | 42                                     | 40.4                                           | 53.2                     |               |                        |                                        |                         |                          |
| 21                               | 53              | 99.9                             | 25                                     | 47.2                                           | 60.4                     |               |                        |                                        |                         |                          |
| 22                               | 19              | 100                              | 10                                     | 52.6                                           | 69.9                     |               |                        |                                        |                         |                          |
| 23                               | 2               | 100                              | 1                                      | 50.0                                           | 72.0                     |               |                        |                                        |                         |                          |

Supplemental Digital Content 5C: Calibration Plots for Weighted Preoperative Risk Score Models, Derivation and

Validation Datasets

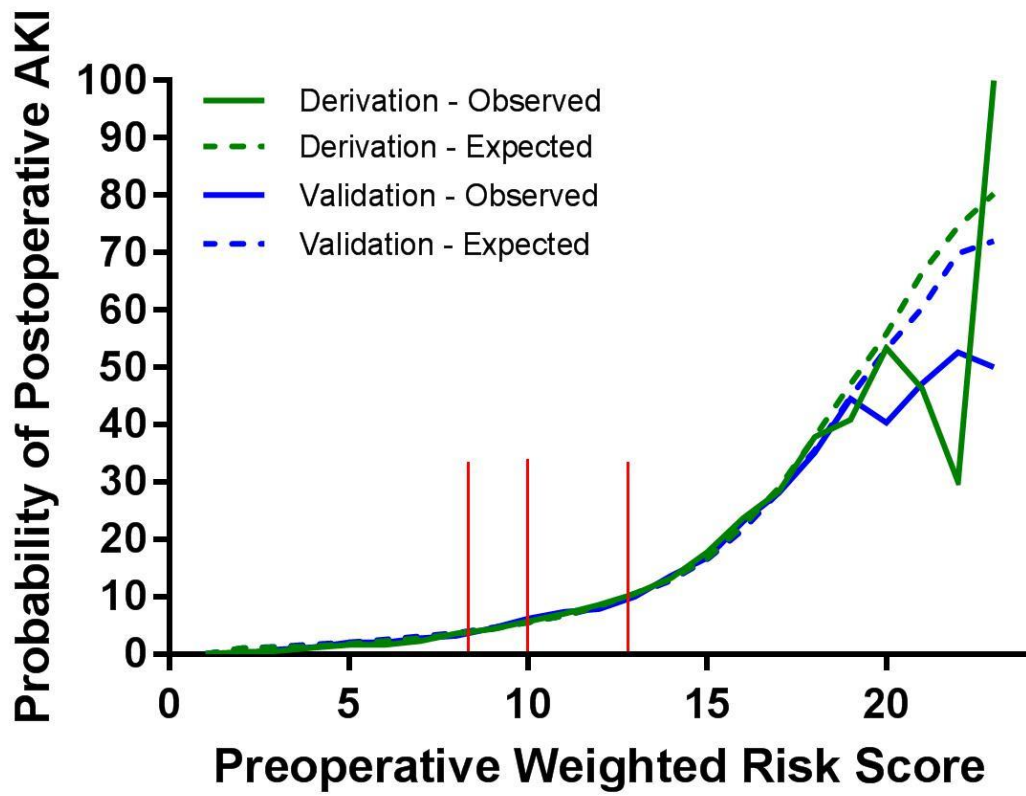

Supplement: NIHMS1062534-supplement-5.pdf [file NIHMS1062534-supplement-5.pdf]
