# Supplementary material
Source: PubMed Central journal article supplement (PMC7015776)
Supplement: NIHMS1062534-supplement-1.pdf [file NIHMS1062534-supplement-1.pdf]

**Supplemental Digital Content 1: Preoperative Patient Characteristics of the Entire Cohort and Univariable Analysis of the Derivation Cohort**

| Category                            | Characteristic                                                                | Univariable Analysis of the Derivation Cohort (N = 91,314) |                                                                |                                                       |               |                                            |                                     |
|-------------------------------------|-------------------------------------------------------------------------------|------------------------------------------------------------|----------------------------------------------------------------|-------------------------------------------------------|---------------|--------------------------------------------|-------------------------------------|
|                                     |                                                                               | Entire Cohort<br>N = 138,021<br>n(%)                       | No Postoperative<br>Acute Kidney<br>Injury<br>N=83,022<br>n(%) | Acute Kidney Injury<br>(any Stage)<br>N=8,292<br>n(%) | p-Value       | Odds Ratio<br>(95% Confidence<br>Interval) | % Cases<br>with<br>Complete<br>Data |
| <b>Anthropometric<br/>Data</b>      | Age ¥                                                                         | 58 [46 - 69]                                               | 58 [45 - 69]                                                   | 62 [51 - 72]                                          | <0.001        | N/A                                        | 100.0                               |
|                                     | Body Mass Index ¥                                                             | 28.2 [24.2 - 33.5]                                         | 28.2 [24.2 - 33.4]                                             | 29.1 [24.6 - 35.4]                                    | <0.001        | N/A                                        | 89.0                                |
|                                     | Gender (Male)                                                                 | 69,566 (50.4)                                              | 41,176 (49.6)                                                  | 4,820 (58.1)                                          | <0.001        | 1.4 (1.3-1.5)                              | 100.0                               |
| <b>Patient Medical<br/>History*</b> | Congestive Heart Failure                                                      | 12,225 (9.3)                                               | 6,537 (8.2)                                                    | 1,527 (19.2)                                          | <0.001        | 2.7 (2.5-2.8)                              | 96.0                                |
|                                     | Cardiac Arrhythmias                                                           | 20,614 (15.6)                                              | 11,163 (14.7)                                                  | 1,897 (23.9)                                          | <0.001        | 1.8 (1.7-1.9)                              | 96.0                                |
|                                     | Valvular Disease                                                              | 7,538 (5.7)                                                | 4,118 (5.2)                                                    | 848 (10.7)                                            | <0.001        | 2.2 (2.0-2.4)                              | 96.0                                |
|                                     | Pulmonary Circulation Disorders                                               | 6,405 (4.8)                                                | 3,436 (4.3)                                                    | 778 (9.8)                                             | <0.001        | 2.4 (2.2-2.6)                              | 96.0                                |
|                                     | Peripheral Vascular Disorders                                                 | 15,086 (11.4)                                              | 8,392 (10.5)                                                   | 1,539 (19.4)                                          | <0.001        | 2.0 (1.9-2.2)                              | 96.0                                |
|                                     | Hypertension, Uncomplicated                                                   | 49,574 (37.4)                                              | 29,312 (36.8)                                                  | 3,526 (44.3)                                          | <0.001        | 1.4 (1.3-1.4)                              | 96.0                                |
|                                     | Hypertension, Complicated                                                     | 8,040 (6.1)                                                | 3,959 (5.0)                                                    | 1,306 (16.4)                                          | <0.001        | 3.8 (3.5-4.0)                              | 96.0                                |
|                                     | Paralysis/Other Neurological<br>Disorders                                     | 10,993 (8.3)                                               | 6,367 (8.0)                                                    | 876 (11.1)                                            | <0.001        | 1.4 (1.3-1.5)                              | 96.0                                |
|                                     | Chronic Pulmonary Disease                                                     | 21,821 (16.5)                                              | 12,615 (15.8)                                                  | 1,829 (23.0)                                          | <0.001        | 1.6 (1.5-1.7)                              | 96.0                                |
|                                     | Diabetes, Uncomplicated                                                       | 20,939 (15.8)                                              | 11,907 (14.9)                                                  | 1,953 (24.6)                                          | <0.001        | 1.9 (1.8-2.0)                              | 96.0                                |
|                                     | Diabetes, Complicated                                                         | 2,233 (1.7)                                                | 1,081 (1.4)                                                    | 379 (4.8)                                             | <0.001        | 3.6 (3.2-4.1)                              | 96.0                                |
|                                     | Hypothyroidism                                                                | 12,395 (9.0)                                               | 7,428 (9.3)                                                    | 829 (10.4)                                            | <0.001        | 1.1 (1.1-1.2)                              | 96.0                                |
|                                     | Liver Disease                                                                 | 9,913 (7.5)                                                | 5,299 (6.6)                                                    | 1,215 (15.3)                                          | <0.001        | 2.5 (2.4-2.7)                              | 96.0                                |
|                                     | Peptic Ulcer Disease Excluding<br>Bleeding                                    | 2,092 (1.6)                                                | 1,155 (1.4)                                                    | 183 (2.3)                                             | <0.001        | 1.6 (1.4-1.9)                              | 96.0                                |
|                                     | AIDS/HIV                                                                      | 253 (0.2)                                                  | 149 (0.2)                                                      | 25 (0.3)                                              | 0.015         | 1.7 (1.1-2.6)                              | 96.0                                |
|                                     | Lymphoma/Metastatic<br>Cancer/Solid Tumor                                     | 26,166 (19.8)                                              | 15,612 (19.6)                                                  | 1,729 (21.7)                                          | <0.001        | 1.1 (1.1-1.2)                              | 96.0                                |
|                                     | Rheumatoid Arthritis / Collagen<br>Vascular Diseases                          | 4,555 (3.4)                                                | 2,715 (3.4)                                                    | 293 (3.7)                                             | 0.194         | 1.1 (0.9-1.2)                              | 96.0                                |
|                                     | Coagulopathy                                                                  | 8,079 (6.1)                                                | 4,126 (5.2)                                                    | 1,229 (15.5)                                          | <0.001        | 3.3 (3.1-3.6)                              | 96.0                                |
|                                     | Weight Loss                                                                   | 12,982 (9.8)                                               | 7,112 (8.9)                                                    | 1,466 (18.4)                                          | <0.001        | 2.3 (2.2-2.5)                              | 96.0                                |
|                                     | Alcohol Abuse                                                                 | 4,726 (3.6)                                                | 2,720 (3.4)                                                    | 361 (4.5)                                             | <0.001        | 1.3 (1.2-1.5)                              | 96.0                                |
| Drug Abuse                          | 3,160 (2.4)                                                                   | 1,886 (2.4)                                                | 219 (2.8)                                                      | 0.031                                                 | 1.2 (1.0-1.3) | 96.0                                       |                                     |
| Psychoses                           | 1,627 (1.2)                                                                   | 934 (1.2)                                                  | 114 (1.4)                                                      | 0.041                                                 | 1.2 (1.1-1.5) | 96.0                                       |                                     |
| <b>Preoperative<br/>Medications</b> | Angiotensin Converting Enzyme<br>Inhibitor or Angiotensin Receptor<br>Blocker | 20,187 (14.6)                                              | 12,007 (14.5)                                                  | 1,315 (15.9)                                          | <0.001        | 1.1 (1.0-1.2)                              | 100.0                               |
|                                     | Beta Blocker                                                                  | 24,351 (17.6)                                              | 14,353 (17.3)                                                  | 1,796 (21.7)                                          | <0.001        | 1.3 (1.3-1.4)                              | 100.0                               |

|                                                                    |                                                     |                    |                    |                   |        |               |       |
|--------------------------------------------------------------------|-----------------------------------------------------|--------------------|--------------------|-------------------|--------|---------------|-------|
| <b>Preoperative Laboratory Values</b>                              | Preoperative Serum Hemoglobin Level (g/dL) ¥        | 12.3 [10.3 - 13.8] | 12.5 [10.5 - 13.9] | 10.8 [9.1 - 12.7] | <0.001 | N/A           | 98.4  |
|                                                                    | Preoperative Serum Albumin Level (g/dL) ¥           | 4.0 [3.3 - 4.4]    | 4.0 [3.4 - 4.4]    | 3.5 [2.8 - 4.1]   | <0.001 | NA            | 55.0% |
| <b>Preoperative eGFR** (mL/min/1.73 m<sup>2</sup>)</b>             | ≥ 90                                                | 66,831 (48.4)      | 41,230 (49.7)      | 2,859 (34.5)      | <0.001 | N/A           | 100.0 |
|                                                                    | 60-89                                               | 47,137 (34.2)      | 28,975 (34.9)      | 2,338 (28.2)      |        |               |       |
|                                                                    | 45-59                                               | 12,308 (8.9)       | 7,114 (8.6)        | 1,040 (12.5)      |        |               |       |
|                                                                    | 30-44                                               | 7,431 (5.4)        | 3,921 (4.7)        | 1,004 (12.1)      |        |               |       |
|                                                                    | 15-29                                               | 4,314 (3.1)        | 1,782 (2.1)        | 1,051 (12.7)      |        |               |       |
| <b>Preinduction Blood Pressure</b>                                 | Mean Arterial Pressure (mmHg)¥                      | 90 [80 - 101]      | 90 [80 - 101]      | 88 [76 - 100]     | <0.001 | N/A           | 99.9  |
| <b>Surgical Characteristics</b>                                    | Emergent Procedure                                  | 17,283 (12.8)      | 9,962 (12.3)       | 1,532 (19.0)      | <0.001 | 1.7 (1.6-1.8) | 97.5  |
| <b>Surgical Procedure Type / Body Region (Anesthesia CPT Code)</b> | Head (0100-00222)                                   | 13,994 (10.2)      | 8,816 (10.7)       | 432 (5.2)         | <0.001 | N/A           | 99.6  |
|                                                                    | Neck (00300-00352)                                  | 8,387 (6.1)        | 5,026 (6.1)        | 530 (6.4)         |        |               |       |
|                                                                    | Thorax - chest wall & shoulder girdle (00400-00474) | 5,509 (4.0)        | 3,288 (4.0)        | 319 (3.9)         |        |               |       |
|                                                                    | Thorax - intrathoracic (00500-00580)                | 13,513 (9.8)       | 7,999 (9.7)        | 937 (11.3)        |        |               |       |
|                                                                    | Spine and spinal cord (00600-00670)                 | 11,654 (8.5)       | 7,332 (8.9)        | 332 (4.0)         |        |               |       |
|                                                                    | Upper abdomen (00700-00797)                         | 28,586 (20.8)      | 16,598 (20.1)      | 2,349 (28.4)      |        |               |       |
|                                                                    | Lower abdomen (00800-00882)                         | 14,128 (10.3)      | 8,343 (10.1)       | 1,051 (12.7)      |        |               |       |
|                                                                    | Perineum (00902-00952)                              | 1,540 (1.1)        | 971 (1.2)          | 58 (0.7)          |        |               |       |
|                                                                    | Pelvis, except hip (01112-01190)                    | 1,067 (0.8)        | 663 (0.8)          | 45 (0.5)          |        |               |       |
|                                                                    | Upper leg, except knee (01200-01274)                | 11,658 (8.5)       | 6,948 (8.4)        | 691 (8.4)         |        |               |       |
|                                                                    | Knee and popliteal area (01320-01444)               | 7,073 (5.1)        | 4,428 (5.4)        | 276 (3.3)         |        |               |       |
|                                                                    | Lower leg, ankle, and foot (01462-01522)            | 4,686 (3.4)        | 2,799 (3.4)        | 277 (3.4)         |        |               |       |
|                                                                    | Shoulder and axilla (01610-01682)                   | 1,558 (1.1)        | 980 (1.2)          | 77 (0.9)          |        |               |       |
|                                                                    | Upper arm and elbow (01710-01782)                   | 970 (0.7)          | 612 (0.7)          | 30 (0.4)          |        |               |       |
|                                                                    | Forearm, wrist, and hand (01810-01860)              | 1,584 (1.2)        | 982 (1.2)          | 91 (1.1)          |        |               |       |

|                                    |                                             |                       |                       |                       |        |               |       |
|------------------------------------|---------------------------------------------|-----------------------|-----------------------|-----------------------|--------|---------------|-------|
|                                    | Radiological procedure (01916-01936) ***    | 9,315 (6.8)           | 5,537 (6.7)           | 603 (7.3)             |        |               |       |
|                                    | Burn excisions or debridement (01951-01953) | 932 (0.7)             | 560 (0.7)             | 77 (0.9)              |        |               |       |
|                                    | Obstetric (01958-01969)                     | 1,312 (1.0)           | 799 (1.0)             | 93 (1.1)              |        |               |       |
| <b>Anesthetic Characteristics</b>  | General Anesthetic Used                     | 122,371 (87.3)        | 71,628 (86.3)         | 7,382 (89.0)          | <0.001 | 1.3 (1.2-1.4) | 100.0 |
|                                    | Anesthetic Duration, min ¥                  | 194.0 [136.0 - 283.0] | 193.0 [135.0 - 280.0] | 198.0 [135.0 - 304.0] | <0.001 | N/A           | 100.0 |
| <b>ASA Physical Classification</b> | ASA 1                                       | 4,355 (3.1)           | 2,756 (3.6)           | 123 (1.7)             | <0.001 | N/A           | 92.7  |
|                                    | ASA 2                                       | 40,654 (29.0)         | 25,670 (33.2)         | 1,039 (14.0)          |        |               |       |
|                                    | ASA 3                                       | 68,639 (49.0)         | 40,612 (52.6)         | 4,206 (56.5)          |        |               |       |
|                                    | ASA 4                                       | 15,970 (11.4)         | 7,978 (10.3)          | 1,962 (26.4)          |        |               |       |
|                                    | ASA 5                                       | 505 (0.4)             | 188 (0.2)             | 110 (1.5)             |        |               |       |
| <b>Institution Characteristics</b> | Non-University Hospital                     | 14,825 (10.6)         | 8,929 (10.8)          | 877 (10.6)            | 0.617  | 1.0 (0.9-1.1) | 100.0 |
|                                    | Institution A                               | 67,705 (49.1)         | 41,021 (49)           | 3,677 (44)            | <0.001 | 0.8 (0.8-0.8) | 100.0 |
|                                    | Institution B                               | 24,499 (17.8)         | 14,775 (18)           | 1,513 (18)            | 0.307  | 1.0(1.0-1.1)  | 100.0 |
|                                    | Institution C                               | 4,728 (3.4)           | 2,905 (3.5)           | 237 (2.9)             | 0.002  | 0.8 (0.7-0.9) | 100.0 |
|                                    | Institution D                               | 25,488 (18.5)         | 14,894 (18)           | 1,918 (23)            | <0.001 | 1.4 (1.3-1.5) | 100.0 |
|                                    | Institution E                               | 857 (0.6)             | 498 (0.6)             | 70 (0.8)              | 0.007  | 1.4 (1.1-1.8) | 100.0 |
|                                    | Institution F                               | 6,572 (4.8)           | 3,945 (4.8)           | 446 (5.4)             | 0.011  | 1.1 (1.0-1.3) | 100.0 |
|                                    | Institution G                               | 5,471 (4.0)           | 3,318 (4.0)           | 310 (3.7)             | 0.251  | 0.9 (0.8-1.1) | 100.0 |
|                                    | Institution H                               | 2,701 (2.0)           | 1,666 (2.0)           | 121 (1.5)             | 0.001  | 0.7 (0.6-0.9) | 100.0 |

\*As determined by Elixhauser Comorbidity Enhanced ICD-9-CM/ICD-10 CM Algorithm; excluding renal failure, obesity, and fluid/electrolyte disorders.

\*\* As determined by CKD-EPI formula, indexed by body surface area; stratified by Kidney Disease Improving Global Outcomes chronic kidney disease guidelines. Race assumed non-black for patients with race data unavailable.

\*\*\* Including procedures with and without intravenous contrast

¥ = non-parametric data presented as median [25<sup>th</sup> to 75<sup>th</sup> percentile]

AIDS = autoimmune deficiency syndrome; ASA = American Society of Anesthesiologists; CKD-EPI = Chronic Kidney Disease Epidemiology Collaboration; CPT = Common Procedural Terminology; eGFR = estimated glomerular filtration rate; HIV = human immunodeficiency virus
