# Supplementary material
Source: PubMed Central journal article supplement (PMC7015776)
Supplement: NIHMS1062534-supplement-3.pdf [file NIHMS1062534-supplement-3.pdf]

**Supplemental Digital Content 3: Missing Data Analysis – Univariate Analyses of Preoperative Patient Characteristics Among Patients Reviewed for Derivation Cohort Inclusion**

| Category                                               | Characteristic                                                          | Cases with Complete Data ****<br>N=70,929<br>n(%) | Cases with Incomplete Data *****<br>N=20,385<br>n(%) | p-Value |
|--------------------------------------------------------|-------------------------------------------------------------------------|---------------------------------------------------|------------------------------------------------------|---------|
| <b>Anthropometric Data</b>                             | Age ¥                                                                   | 58 [46-69]                                        | 58 [44-70]                                           | 0.052   |
|                                                        | Body Mass Index ¥                                                       | 28 [24-34]                                        | 28 [24-33]                                           | 0.131   |
|                                                        | Gender (Male)                                                           | 35,941 (51)                                       | 10,055 (49)                                          | 0.001   |
| <b>Patient Medical History*</b>                        | Congestive Heart Failure                                                | 6,596 (9.3)                                       | 1,468 (8.8)                                          | 0.039   |
|                                                        | Cardiac Arrhythmias                                                     | 10,803 (15)                                       | 2,777 (17)                                           | <0.001  |
|                                                        | Valvular Disease                                                        | 3,849 (5.4)                                       | 1,117 (6.7)                                          | <0.001  |
|                                                        | Pulmonary Circulation Disorders                                         | 3,363 (4.7)                                       | 851 (5.1)                                            | 0.056   |
|                                                        | Peripheral Vascular Disorders                                           | 7,968 (11)                                        | 1,963 (12)                                           | 0.059   |
|                                                        | Hypertension, Uncomplicated                                             | 27,847 (39)                                       | 4,991 (30)                                           | <0.001  |
|                                                        | Hypertension, Complicated                                               | 4,533 (6.4)                                       | 732 (4.4)                                            | <0.001  |
|                                                        | Paralysis/Other Neurological Disorders                                  | 5,519 (7.8)                                       | 1,724 (10)                                           | <0.001  |
|                                                        | Chronic Pulmonary Disease                                               | 11,981 (17)                                       | 2,463 (15)                                           | <0.001  |
|                                                        | Diabetes, Uncomplicated                                                 | 11,440 (16)                                       | 2,420 (15)                                           | <0.001  |
|                                                        | Diabetes, Complicated                                                   | 1,199 (1.7)                                       | 261 (1.6)                                            | 0.243   |
|                                                        | Hypothyroidism                                                          | 7,363 (10)                                        | 894 (5.4)                                            | <0.001  |
|                                                        | Liver Disease                                                           | 4,998 (7.0)                                       | 1,516 (9.1)                                          | <0.001  |
|                                                        | Peptic Ulcer Disease Excluding Bleeding                                 | 1,111 (1.6)                                       | 227 (1.4)                                            | 0.049   |
|                                                        | AIDS/HIV                                                                | 132 (0.2)                                         | 42 (0.3)                                             | 0.088   |
|                                                        | Lymphoma/Metastatic Cancer/Solid Tumor                                  | 14,428 (20)                                       | 2,913 (17)                                           | <0.001  |
|                                                        | Rheumatoid Arthritis / Collagen Vascular Diseases                       | 2,568 (3.6)                                       | 440 (2.6)                                            | <0.001  |
| Coagulopathy                                           | 4,231 (6.0)                                                             | 1,124 (6.7)                                       | <0.001                                               |         |
| Weight Loss                                            | 6,074 (8.6)                                                             | 2,504 (15)                                        | <0.001                                               |         |
| Alcohol Abuse                                          | 2,597 (3.7)                                                             | 484 (2.9)                                         | <0.001                                               |         |
| Drug Abuse                                             | 1,803 (2.5)                                                             | 302 (1.8)                                         | <0.001                                               |         |
| Psychoses                                              | 784 (1.1)                                                               | 264 (1.6)                                         | <0.001                                               |         |
| <b>Preoperative Medications</b>                        | Angiotensin Converting Enzyme Inhibitor or Angiotensin Receptor Blocker | 11,437 (16)                                       | 1,885 (9.2)                                          | <0.001  |
|                                                        | Beta Blocker                                                            | 13,817 (20)                                       | 2,332 (11)                                           | <0.001  |
| <b>Preoperative Laboratory Values</b>                  | Preoperative Serum Hemoglobin Level ¥                                   | 12 [10-14]                                        | 12 [10-14]                                           | <0.001  |
| <b>Preoperative eGFR** (mL/min/1.73 m<sup>2</sup>)</b> | ≥ 90                                                                    | 34,447 (49)                                       | 9,642 (47)                                           | <0.001  |
|                                                        | 60-89                                                                   | 24,378 (34)                                       | 6,935 (34)                                           |         |
|                                                        | 45-59                                                                   | 6,327 (8.9)                                       | 1,827 (9.0)                                          |         |
|                                                        | 30-44                                                                   | 3,742 (5.3)                                       | 1,183 (5.8)                                          |         |
|                                                        | 15-29                                                                   | 2,035 (2.9)                                       | 798 (3.9)                                            |         |
| <b>Preinduction Blood Pressure</b>                     | Mean Arterial Pressure (mmHg)¥                                          | 91 [81-101]                                       | 88 [76-101]                                          | <0.001  |
| <b>Surgical Characteristics</b>                        | Emergent Procedure                                                      | 5,918 (8.3)                                       | 5,576 (31)                                           | <0.001  |

|                                                                    |                                                     |               |               |        |        |
|--------------------------------------------------------------------|-----------------------------------------------------|---------------|---------------|--------|--------|
| <b>Surgical Procedure Type / Body Region (Anesthesia CPT Code)</b> | Head (0100-00222)                                   | 7,097 (10)    | 2,151 (11)    | <0.001 |        |
|                                                                    | Neck (00300-00352)                                  | 4,496 (6.4)   | 1,060 (5.2)   |        |        |
|                                                                    | Thorax - chest wall & shoulder girdle (00400-00474) | 2,709 (3.8)   | 898 (4.4)     |        |        |
|                                                                    | Thorax - intrathoracic (00500-00580)                | 7,595 (11)    | 1,341 (6.6)   |        |        |
|                                                                    | Spine and spinal cord (00600-00670)                 | 5,773 (8.2)   | 1,891 (9.3)   |        |        |
|                                                                    | Upper abdomen (00700-00797)                         | 15,199 (22)   | 3,748 (18)    |        |        |
|                                                                    | Lower abdomen (00800-00882)                         | 6,394 (9.1)   | 3,000 (15)    |        |        |
|                                                                    | Perineum (00902-00952)                              | 790 (1.1)     | 239 (1.2)     |        |        |
|                                                                    | Pelvis, except hip (01112-01190)                    | 545 (0.8)     | 163 (0.8)     |        |        |
|                                                                    | Upper leg, except knee (01200-01274)                | 5,803 (8.2)   | 1,836 (9.0)   |        |        |
|                                                                    | Knee and popliteal area (01320-01444)               | 3,435 (4.9)   | 1,269 (6.2)   |        |        |
|                                                                    | Lower leg, ankle, and foot (01462-01522)            | 2,317 (3.3)   | 759 (3.7)     |        |        |
|                                                                    | Shoulder and axilla (01610-01682)                   | 795 (1.1)     | 262 (1.3)     |        |        |
|                                                                    | Upper arm and elbow (01710-01782)                   | 457 (0.6)     | 185 (0.9)     |        |        |
|                                                                    | Forearm, wrist, and hand (01810-01860)              | 699 (1.0)     | 374 (1.8)     |        |        |
|                                                                    | Radiological procedure (01916-01936)***             | 5,318 (7.5)   | 822 (4.0)     |        |        |
|                                                                    | Burn excisions or debridement (01951-01953)         | 578 (0.8)     | 59 (0.3)      |        |        |
|                                                                    | Obstetric (01958-01969)                             | 597 (0.8)     | 295 (1.4)     |        |        |
| <b>Anesthetic Characteristics</b>                                  | General Anesthetic Used                             | 60,633 (86)   | 18,377 (90)   |        | <0.001 |
|                                                                    | Anesthetic Duration, min ¥                          | 200 [140-292] | 172 [121-249] |        | <0.001 |
| <b>ASA Physical Classification</b>                                 | ASA 1                                               | 2,168 (3.1)   | 711 (5.2)     | <0.001 |        |
|                                                                    | ASA 2                                               | 22,067 (31)   | 4,642 (34)    |        |        |
|                                                                    | ASA 3                                               | 38,307 (54)   | 6,511 (48)    |        |        |
|                                                                    | ASA 4                                               | 8,177 (12)    | 1,763 (13)    |        |        |
|                                                                    | ASA 5                                               | 210 (0.3)     | 88 (0.6)      |        |        |
| <b>Institution Characteristics</b>                                 | Non-University Hospital                             | 5,190 (7.3)   | 4,616 (23)    | <0.001 |        |
|                                                                    | Institution A                                       | 42,879 (61)   | 1,819 (8.9)   | <0.001 |        |
|                                                                    | Institution B                                       | 6,879 (9.7)   | 9,409 (46)    |        |        |
|                                                                    | Institution C                                       | 2,770 (3.9)   | 372 (1.8)     |        |        |
|                                                                    | Institution D                                       | 12,971 (18)   | 3,841 (19)    |        |        |
|                                                                    | Institution E                                       | 240 (0.3)     | 328 (1.6)     |        |        |
|                                                                    | Institution F                                       | 3,571 (5.0)   | 820 (4.0)     |        |        |
|                                                                    | Institution G                                       | 88 (0.1)      | 3,540 (17)    |        |        |
|                                                                    | Institution H                                       | 1,531 (2.2)   | 256 (1.3)     |        |        |

\*As determined by Elixhauser Comorbidity Enhanced ICD-9-CM/ICD-10 CM Algorithm; excluding renal failure, obesity, and fluid/electrolyte disorders.

\*\* As determined by CKD-EPI formula, indexed by body surface area; stratified by Kidney Disease Improving Global Outcomes chronic kidney disease guidelines. Race assumed non-black for patients with race data unavailable.

\*\*\* Including procedures with and without intravenous contrast

\*\*\*\* Included in the multivariable analysis of preoperative characteristics and postoperative acute kidney injury, derivation cohort.

\*\*\*\*\* Excluded from the multivariable analysis of preoperative characteristics and postoperative acute kidney injury, derivation cohort.

¥ = non-parametric data presented as median [25<sup>th</sup> to 75<sup>th</sup> percentile]

AIDS = autoimmune deficiency syndrome; ASA = American Society of Anesthesiologists; CKD-EPI = Chronic Kidney Disease Epidemiology Collaboration; CPT = Common Procedural Terminology; eGFR = estimated glomerular filtration rate; HIV = human immunodeficiency virus
