# Supplementary material
Source: PubMed Central journal article supplement (PMC7015776)
Supplement: NIHMS1062534-supplement-4.pdf [file NIHMS1062534-supplement-4.pdf]

## Supplemental Digital Content 4: Independent Preoperative Predictors of Acute Kidney Injury from the Derivation

### Cohort of 70,929 Patients: Multivariable Logistic Regression Full Model †

| Risk Factor                                                      | $\beta$ Coefficient   | Adjusted Odds Ratio / (95% Confidence Interval) |
|------------------------------------------------------------------|-----------------------|-------------------------------------------------|
| <b>Medical Factors</b>                                           |                       |                                                 |
| Patient Age (years) <sup>§</sup>                                 | 0.0000134             | 1.00 (0.99-1.00)                                |
| BMI (kg/m <sup>2</sup> ) <sup>§§</sup>                           | 0.178                 | 1.19 (1.15-1.24)                                |
| Male Gender                                                      | 0.306                 | 1.36 (1.28-1.44)                                |
| <b>Patient Medical History *</b>                                 |                       |                                                 |
| Liver Disease                                                    | 0.464                 | 1.59 (1.45-1.74)                                |
| Coagulopathy                                                     | 0.403                 | 1.50 (1.36-1.64)                                |
| Hypertension, Complicated                                        | 0.553                 | 1.74 (1.58-1.91)                                |
| Diabetes, Complicated                                            | 0.411                 | 1.51 (1.30-1.76)                                |
| Weight Loss                                                      | 0.185                 | 1.20 (1.10-1.31)                                |
| Pulmonary Circulation Disorders                                  | 0.147                 | 1.16 (1.04-1.29)                                |
| AIDS/HIV                                                         | 0.461                 | 1.59 (0.94-2.67)                                |
| Congestive Heart Failure                                         | 0.046                 | 1.05 (0.95-1.15)                                |
| Cardiac Arrhythmias                                              | 0.081                 | 1.08 (1.01-1.17)                                |
| Peripheral Vascular Disorders                                    | 0.059                 | 1.06 (0.98-1.15)                                |
| Chronic Pulmonary Disease                                        | 0.004                 | 1.00 (0.93-1.08)                                |
| Hypertension, Uncomplicated                                      | 0.007                 | 1.01 (0.94-1.07)                                |
| Diabetes, Uncomplicated                                          | 0.060                 | 1.06 (0.99-1.14)                                |
| Lymphoma                                                         | 0.125                 | 1.13 (0.93-1.38)                                |
| Paralysis/Other Neurological Disorders                           | 0.103                 | 1.11 (1.01-1.22)                                |
| Metastatic Cancer                                                | 0.008                 | 1.01 (0.91-1.12)                                |
| Psychoses                                                        | -0.076                | 0.93 (0.73-1.18)                                |
| Valvular Disease                                                 | -0.024                | 0.98 (0.88-1.09)                                |
| Drug Abuse                                                       | -0.039                | 0.97 (0.82-1.16)                                |
| Rheumatoid Arthritis / Collagen Vascular Diseases                | -0.060                | 0.94 (0.82-1.09)                                |
| Peptic Ulcer Disease Excluding Bleeding                          | 0.032                 | 1.03 (0.85-1.25)                                |
| Solid Tumor                                                      | -0.016                | 0.98 (0.90-1.07)                                |
| Hypothyroidism                                                   | -0.080                | 0.92 (0.84-1.01)                                |
| Alcohol Abuse                                                    | -0.154                | 0.86 (0.75-0.99)                                |
| <b>Preoperative Chronic Medications</b>                          |                       |                                                 |
| ACEI/ARB                                                         | 0.028                 | 1.03 (0.95-1.12)                                |
| Beta Blocker                                                     | -0.022                | 0.98 (0.91-1.05)                                |
| Hemoglobin, g/dL <sup>§</sup>                                    | -0.006                | 0.99 (0.99-0.99)                                |
| Preoperative eGFR (mL/min/1.73 m <sup>2</sup> ) <sup>§</sup>     | -0.00002              | 0.99 (0.99-0.99)                                |
| Preinduction Baseline Mean Arterial Pressure (mmHg) <sup>§</sup> | 0.000009              | 1.00 (1.00-1.00)                                |
| <b>Surgical Factors</b>                                          |                       |                                                 |
| <b>Surgical Body Region</b>                                      |                       |                                                 |
| Elevated Risk (all regions except below)                         | 0.857                 | 2.36 (2.14-2.60)                                |
| Low Risk (ENT, upper extremity, spine)                           |                       | (reference)                                     |
| Emergent Surgery                                                 | 0.350                 | 1.42 (1.29-1.56)                                |
| <b>Anesthetic Factors</b>                                        |                       |                                                 |
| <b>ASA Class</b>                                                 |                       |                                                 |
| ASA Class 1                                                      |                       | (reference)                                     |
| ASA Class 2                                                      | 0.056                 | 1.06 (0.83-1.35)                                |
| ASA Class 3                                                      | 0.730                 | 2.08 (1.63-2.64)                                |
| ASA Class 4                                                      | 1.132                 | 3.10 (2.42-3.98)                                |
| ASA Class 5                                                      | 1.876                 | 6.52 (4.43-9.61)                                |
| Expected Anesthesia Duration (Hours) <sup>§§§</sup>              | 1.208                 | 3.35 (2.95-3.80)                                |
| General Anesthesia                                               | 0.308                 | 1.36 (1.24-1.49)                                |
| <b>Institutional Factors</b>                                     |                       |                                                 |
| Non-university Hospital                                          | -0.062                | 0.94 (0.66-1.34)                                |
| Institution (Random Effect), ICC (95% CI)                        |                       | 0.21 (0.11-0.38)                                |
| <b>C-statistic (95% CI)</b>                                      |                       |                                                 |
|                                                                  |                       | 0.75 (0.74-0.76)                                |
| <b>Preoperative Risk Quartiles</b>                               |                       |                                                 |
|                                                                  | Number of Cases, n(%) | Observed AKI Proportion (%)                     |
| Quartile 1 (Low Risk)                                            | 17,733 (25)           | 2.0                                             |
| Quartile 2 (Medium Risk)                                         | 17,732 (25)           | 4.3                                             |
| Quartile 3 (High Risk)                                           | 17,732 (25)           | 8.2                                             |
| Quartile 4 (Highest Risk)                                        | 17,732 (25)           | 19.8                                            |

† Mixed effects model with anonymized institution ID as random effect; all other covariates fixed effects.

§ Squared transformation

§§ Square root transformation

§§§ Logarithmic transformation

\*As determined by Elixhauser Comorbidity Enhanced ICD-9-CM/ICD-10 CM Algorithm

AKI = acute kidney injury; ASA = American Society of Anesthesiologists; AIDS = autoimmune deficiency syndrome; CI = confidence interval; CKD = chronic kidney disease; CKD-EPI = Chronic Kidney Disease Epidemiology Collaboration; CPT = Current Procedural Terminology; eGFR = estimated glomerular filtration rate; ENT = ear/nose/throat; HIV = human immunodeficiency virus; ICC = intraclass correlation coefficient; KDIGO = Kidney Disease: Improving Global Outcomes; WHO = World Health Organization
