# Supplementary material
Source: PubMed Central journal article supplement (PMC7015776)
Supplement: NIHMS1062534-supplement-7.pdf [file NIHMS1062534-supplement-7.pdf]

**Supplemental Digital Content 7A: Comparative Acute Kidney Injury Risk Model Performance with Inclusion of Absolute Intraoperative Hypotension Measures – Logistic Regression Full Model<sup>†</sup> Performed on Derivation Cohort**

| Risk Factor                                                                                  | $\beta$ Coefficient | Multivariable model p-value | Adjusted Odds Ratio (95% Confidence Interval) |
|----------------------------------------------------------------------------------------------|---------------------|-----------------------------|-----------------------------------------------|
| <b>Medical Factors</b>                                                                       |                     |                             |                                               |
| Patient Age (years) <sup>§</sup>                                                             | 0.0000134           | 0.18                        | 1.00 (0.99-1.00)                              |
| BMI (kg/m <sup>2</sup> ) <sup>§§</sup>                                                       | 0.181               | <0.001                      | 1.20 (1.16-1.24)                              |
| Male Gender                                                                                  | 0.305               | <0.001                      | 1.36 (1.28-1.44)                              |
| <b>Patient Medical History *</b>                                                             |                     |                             |                                               |
| Congestive Heart Failure                                                                     | 0.051               | 0.28                        | 1.05 (0.96-1.15)                              |
| Cardiac Arrhythmias                                                                          | 0.085               | 0.03                        | 1.09 (1.01-1.17)                              |
| Valvular Disease                                                                             | -0.022              | 0.69                        | 0.98 (0.88-1.09)                              |
| Pulmonary Circulation Disorders                                                              | 0.153               | 0.01                        | 1.17 (1.04-1.30)                              |
| Peripheral Vascular Disorders                                                                | 0.059               | 0.15                        | 1.06 (0.98-1.15)                              |
| Hypertension, Uncomplicated                                                                  | 0.012               | 0.72                        | 1.01 (0.95-1.08)                              |
| Hypertension, Complicated                                                                    | 0.557               | <0.001                      | 1.75 (1.59-1.92)                              |
| Paralysis/Other Neurological Disorders                                                       | 0.107               | 0.03                        | 1.11 (1.01-1.23)                              |
| Chronic Pulmonary Disease                                                                    | 0.009               | 0.81                        | 1.01 (0.94-1.09)                              |
| Diabetes, Uncomplicated                                                                      | 0.055               | 0.14                        | 1.06 (0.98-1.14)                              |
| Diabetes, Complicated                                                                        | 0.394               | <0.001                      | 1.48 (1.27-1.73)                              |
| Hypothyroidism                                                                               | -0.084              | 0.07                        | 0.92 (0.84-1.01)                              |
| Liver Disease                                                                                | 0.470               | <0.001                      | 1.60 (1.46-1.75)                              |
| Peptic Ulcer Disease Excluding Bleeding                                                      | 0.026               | 0.79                        | 1.03 (0.85-1.24)                              |
| AIDS/HIV                                                                                     | 0.445               | 0.10                        | 1.56 (0.92-2.63)                              |
| Rheumatoid Arthritis / Collagen Vascular Diseases                                            | -0.056              | 0.45                        | 0.95 (0.82-1.09)                              |
| Coagulopathy                                                                                 | 0.400               | <0.001                      | 1.49 (1.36-1.64)                              |
| Lymphoma                                                                                     | 0.124               | 0.21                        | 1.13 (0.93-1.38)                              |
| Metastatic Cancer                                                                            | 0.010               | 0.84                        | 1.01 (0.91-1.12)                              |
| Solid Tumor                                                                                  | -0.022              | 0.61                        | 0.98 (0.90-1.06)                              |
| Weight Loss                                                                                  | 0.176               | <0.001                      | 1.19 (1.09-1.30)                              |
| Alcohol Abuse                                                                                | -0.151              | 0.03                        | 0.86 (0.75-0.99)                              |
| Drug Abuse                                                                                   | -0.032              | 0.72                        | 0.97 (0.82-1.15)                              |
| Psychoses                                                                                    | -0.072              | 0.56                        | 0.93 (0.73-1.19)                              |
| <b>Preoperative Chronic Medications</b>                                                      |                     |                             |                                               |
| ACEI/ARB                                                                                     | 0.019               | 0.64                        | 1.02 (0.94-1.11)                              |
| Beta Blocker                                                                                 | -0.027              | 0.47                        | 0.97 (0.90-1.05)                              |
| Preoperative hemoglobin (g/dL) <sup>§</sup>                                                  | -0.006              | <0.001                      | 0.99 (0.99-0.99)                              |
| Preoperative eGFR (mL/min/1.73 m <sup>2</sup> ) <sup>*** §</sup>                             | -0.00002            | <0.001                      | 0.99 (0.99-0.99)                              |
| Preinduction Baseline Mean Arterial Pressure (mmHg) <sup>§</sup>                             | 0.00002             | <0.001                      | 1.00002 (1.00001-1.00003)                     |
| <b>Surgical Factors</b>                                                                      |                     |                             |                                               |
| <b>Surgical Body Region</b>                                                                  |                     |                             |                                               |
| Elevated Risk (all regions except below)                                                     | 0.846               | <0.001                      | 2.33 (2.11-2.57)                              |
| Emergent Surgery                                                                             | 0.347               | <0.001                      | 1.41 (1.29-1.55)                              |
| <b>Anesthetic Factors</b>                                                                    |                     |                             |                                               |
| <b>ASA Class</b>                                                                             |                     |                             |                                               |
| ASA Class 1                                                                                  | 0                   |                             | (reference)                                   |
| ASA Class 2                                                                                  | 0.062               | 0.62                        | 1.06 (0.83-1.36)                              |
| ASA Class 3                                                                                  | 0.759               | <0.001                      | 2.11 (1.66-2.69)                              |
| ASA Class 4                                                                                  | 1.154               | <0.001                      | 3.17 (2.47-4.07)                              |
| ASA Class 5                                                                                  | 1.858               | <0.001                      | 6.41 (4.35-9.45)                              |
| Expected Anesthesia Duration <sup>§§§</sup>                                                  | 1.043               | <0.001                      | 2.84 (2.49-3.24)                              |
| General Anesthesia                                                                           | 0.281               | <0.001                      | 1.32 (1.21-1.45)                              |
| <b>Institutional Factors</b>                                                                 |                     |                             |                                               |
| Non-university Hospital (Fixed Effect)                                                       | -0.067              | 0.71                        | 0.93 (0.65-1.34)                              |
| Institution (Random Effect), ICC (95% CI)                                                    |                     |                             | 0.21 (0.11-0.38)                              |
| <b>Intraoperative Hypotension – Absolute</b>                                                 |                     |                             |                                               |
| No Absolute Hypotension (>10 minutes)                                                        | 0                   |                             | (reference)                                   |
| MAP 60-64 mmHg (>10 minutes)                                                                 | 0.101               | 0.007                       | 1.11 (1.03-1.19)                              |
| MAP 55-59 mmHg (>10 minutes)                                                                 | 0.244               | <0.001                      | 1.28 (1.17-1.39)                              |
| MAP 50-54 mmHg (>10 minutes)                                                                 | 0.366               | <0.001                      | 1.44 (1.28-1.62)                              |
| MAP <50 mmHg (>10 minutes)                                                                   | 0.610               | <0.001                      | 1.84 (1.61-2.10)                              |
| Model performance <i>without</i> Absolute Intraoperative Hypotension Variables (c-statistic) |                     |                             | 0.75 (0.74-0.76)                              |

|                                                                                                                |                     |
|----------------------------------------------------------------------------------------------------------------|---------------------|
| Model performance <i>with</i> Absolute Intraoperative Hypotension Variables (c-statistic)                      | 0.75 (0.75-0.76)    |
| Model performance <i>with</i> Absolute Intraoperative Hypotension Variables (net reclassification improvement) | 0.092 (0.067-0.117) |

† Mixed effects model with anonymized institution ID as random effect; all other covariates fixed effects.

\* As determined by Elixhauser Comorbidity Enhanced ICD-9-CM/ICD-10 CM Algorithm

\*\* As determined by CKD-EPI formula, indexed by body surface area. Race assumed non-black for patients with race data unavailable.

§ Squared transformation

§§ Square root transformation

§§§ Logarithmic transformation

*ACEI = angiotensin-converting enzyme inhibitor; AIDS = autoimmune deficiency syndrome; AKI = acute kidney injury; ARB = angiotensin II receptor blocker; ASA = American Society of Anesthesiologists; CKD-EPI = Chronic Kidney Disease Epidemiology Collaboration; CPT = Current Procedural Terminology; eGFR = estimated glomerular filtration rate; HIV = human immunodeficiency virus; ICC = intraclass correlation coefficient; KDIGO = Kidney Disease: Improving Global Outcomes; WHO = World Health Organization*

Log likelihood = -18,347.0

**Supplemental Digital Content 7B: Comparative Acute Kidney Injury Risk Model Performance with Inclusion of Relative Intraoperative Hypotension Measures – Logistic Regression Full Model<sup>†</sup> Performed on Derivation Cohort**

| Risk Factor                                                                                  | $\beta$ Coefficient | Multivariable model p-value | Adjusted Odds Ratio (95% Confidence Interval) |
|----------------------------------------------------------------------------------------------|---------------------|-----------------------------|-----------------------------------------------|
| <b>Medical Factors</b>                                                                       |                     |                             |                                               |
| Patient Age (years) <sup>§</sup>                                                             | 0.000011            | 0.28                        | 1.00 (0.99-1.00)                              |
| BMI (kg/m <sup>2</sup> ) <sup>§§</sup>                                                       | 0.179               | <0.001                      | 1.20 (1.15-1.24)                              |
| Male Gender                                                                                  | 0.304               | <0.001                      | 1.35 (1.28-1.44)                              |
| <b>Patient Medical History *</b>                                                             |                     |                             |                                               |
| Congestive Heart Failure                                                                     | 0.050               | 0.28                        | 1.05 (0.96-1.15)                              |
| Cardiac Arrhythmias                                                                          | 0.082               | 0.03                        | 1.09 (1.01-1.17)                              |
| Valvular Disease                                                                             | -0.024              | 0.67                        | 0.98 (0.88-1.09)                              |
| Pulmonary Circulation Disorders                                                              | 0.147               | 0.01                        | 1.16 (1.04-1.29)                              |
| Peripheral Vascular Disorders                                                                | 0.061               | 0.13                        | 1.06 (0.98-1.15)                              |
| Hypertension, Uncomplicated                                                                  | 0.010               | 0.78                        | 1.01 (0.95-1.08)                              |
| Hypertension, Complicated                                                                    | 0.557               | <0.001                      | 1.75 (1.59-1.92)                              |
| Paralysis/Other Neurological Disorders                                                       | 0.108               | 0.03                        | 1.11 (1.01-1.23)                              |
| Chronic Pulmonary Disease                                                                    | 0.007               | 0.85                        | 1.01 (0.94-1.09)                              |
| Diabetes, Uncomplicated                                                                      | 0.059               | 0.11                        | 1.06 (0.99-1.14)                              |
| Diabetes, Complicated                                                                        | 0.400               | <0.001                      | 1.49 (1.28-1.74)                              |
| Hypothyroidism                                                                               | -0.085              | 0.07                        | 0.92 (0.84-1.01)                              |
| Liver Disease                                                                                | 0.469               | <0.001                      | 1.60 (1.46-1.75)                              |
| Peptic Ulcer Disease Excluding Bleeding                                                      | 0.035               | 0.72                        | 1.04 (0.86-1.25)                              |
| AIDS/HIV                                                                                     | 0.425               | 0.11                        | 1.53 (0.91-2.58)                              |
| Rheumatoid Arthritis / Collagen Vascular Diseases                                            | -0.057              | 0.44                        | 0.94 (0.82-1.09)                              |
| Coagulopathy                                                                                 | 0.399               | <0.001                      | 1.49 (1.36-1.64)                              |
| Lymphoma                                                                                     | 0.122               | 0.22                        | 1.13 (0.93-1.37)                              |
| Metastatic Cancer                                                                            | 0.008               | 0.89                        | 1.01 (0.91-1.12)                              |
| Solid Tumor                                                                                  | -0.022              | 0.61                        | 0.98 (0.90-1.06)                              |
| Weight Loss                                                                                  | 0.179               | <0.001                      | 1.20 (1.10-1.30)                              |
| Alcohol Abuse                                                                                | -0.150              | 0.03                        | 0.86 (0.75-0.99)                              |
| Drug Abuse                                                                                   | -0.035              | 0.69                        | 0.97 (0.81-1.14)                              |
| Psychoses                                                                                    | -0.073              | 0.55                        | 0.93 (0.73-1.18)                              |
| <b>Preoperative Chronic Medications</b>                                                      |                     |                             |                                               |
| ACEI/ARB                                                                                     | 0.021               | 0.62                        | 1.02 (0.94-1.11)                              |
| Beta Blocker                                                                                 | -0.023              | 0.54                        | 0.98 (0.91-1.05)                              |
| Preoperative hemoglobin (g/dL) <sup>§</sup>                                                  | -0.006              | <0.001                      | 0.99 (0.99-0.99)                              |
| Preoperative eGFR (mL/min/1.73 m <sup>2</sup> ) <sup>*** §</sup>                             | -0.00002            | <0.001                      | 0.99 (0.99-0.99)                              |
| Preinduction Baseline Mean Arterial Pressure (mmHg) <sup>§</sup>                             | -0.00002            | 0.003                       | 0.99 (0.99-0.99)                              |
| <b>Surgical Factors</b>                                                                      |                     |                             |                                               |
| <b>Surgical Body Region</b>                                                                  |                     |                             |                                               |
| Elevated Risk (all regions except below)                                                     | 0.855               | <0.001                      | 2.35 (2.13-2.59)                              |
| Emergent Surgery                                                                             | 0.352               | <0.001                      | 1.42 (1.30-1.56)                              |
| <b>Anesthetic Factors</b>                                                                    |                     |                             |                                               |
| <b>ASA Class</b>                                                                             |                     |                             |                                               |
| ASA Class 1                                                                                  | 0                   |                             | (reference)                                   |
| ASA Class 2                                                                                  | 0.061               | 0.63                        | 1.06 (0.83-1.36)                              |
| ASA Class 3                                                                                  | 0.741               | <0.001                      | 2.10 (1.65-2.67)                              |
| ASA Class 4                                                                                  | 1.143               | <0.001                      | 3.14 (2.44-4.02)                              |
| ASA Class 5                                                                                  | 1.863               | <0.001                      | 6.44 (4.37-9.50)                              |
| Expected Anesthesia Duration <sup>§§§</sup>                                                  | 1.103               | <0.001                      | 3.01 (2.64-3.44)                              |
| General Anesthesia                                                                           | 0.270               | <0.001                      | 1.31 (1.20-1.44)                              |
| <b>Institutional Factors</b>                                                                 |                     |                             |                                               |
| Non-university Hospital (Fixed Effect)                                                       | -0.061              | 0.74                        | 0.94 (0.66-1.34)                              |
| Institution (Random Effect), ICC (95% CI)                                                    |                     |                             | 0.21 (0.11-0.38)                              |
| <b>Intraoperative Hypotension - Relative</b>                                                 |                     |                             |                                               |
| No Relative Hypotension                                                                      | 0                   |                             | (reference)                                   |
| MAP 20-30% below baseline (>10 minutes)                                                      | -0.025              | 0.54                        | 0.98 (0.90-1.06)                              |
| MAP 30-40% below baseline (>10 minutes)                                                      | 0.105               | 0.02                        | 1.11 (1.02-1.21)                              |
| MAP $\geq$ 40% below baseline (>10 minutes)                                                  | 0.380               | <0.001                      | 1.46 (1.31-1.63)                              |
| Model performance <i>without</i> Relative Intraoperative Hypotension Variables (c-statistic) |                     |                             | 0.75 (0.74-0.76)                              |
| Model performance <i>with</i> Relative Intraoperative Hypotension Variables (c-statistic)    |                     |                             | 0.75 (0.75-0.76)                              |

|                                                                                                                |                     |
|----------------------------------------------------------------------------------------------------------------|---------------------|
| Model performance <i>with</i> Relative Intraoperative Hypotension Variables (net reclassification improvement) | 0.124 (0.098-0.150) |
|----------------------------------------------------------------------------------------------------------------|---------------------|

† Mixed effects model with anonymized institution ID as random effect; all other covariates fixed effects.

\* As determined by Elixhauser Comorbidity Enhanced ICD-9-CM/ICD-10 CM Algorithm

\*\* As determined by CKD-EPI formula, indexed by body surface area. Race assumed non-black for patients with race data unavailable.

§ Squared transformation

§§ Square root transformation

§§§ Logarithmic transformation

*ACEI = angiotensin-converting enzyme inhibitor; AIDS = autoimmune deficiency syndrome; AKI = acute kidney injury; ARB = angiotensin II receptor blocker; ASA = American Society of Anesthesiologists; CKD-EPI = Chronic Kidney Disease Epidemiology Collaboration; CPT = Current Procedural Terminology; eGFR = estimated glomerular filtration rate; HIV = human immunodeficiency virus; ICC = intraclass correlation coefficient; KDIGO = Kidney Disease: Improving Global Outcomes; WHO = World Health Organization*

*Log likelihood = -18,366.23*

**Supplemental Digital Content 7C: Comparative Acute Kidney Injury Risk Model Performance with Inclusion of Absolute Intraoperative Hypotension Measures – Logistic Regression Full Model<sup>†</sup> Performed on Validation Cohort**

| Risk Factor                                                                                  | $\beta$ Coefficient | Multivariable model p-value | Adjusted Odds Ratio (95% Confidence Interval) |
|----------------------------------------------------------------------------------------------|---------------------|-----------------------------|-----------------------------------------------|
| <b>Medical Factors</b>                                                                       |                     |                             |                                               |
| Patient Age (years) <sup>§</sup>                                                             | 0.000036            | 0.011                       | 1.00 (1.00-1.00)                              |
| BMI (kg/m <sup>2</sup> ) <sup>§§</sup>                                                       | 0.197               | <0.001                      | 1.22 (1.15-1.28)                              |
| Male Gender                                                                                  | 0.342               | <0.001                      | 1.41 (1.30-1.53)                              |
| <b>Patient Medical History *</b>                                                             |                     |                             |                                               |
| Congestive Heart Failure                                                                     | 0.101               | 0.121                       | 1.11 (0.97-1.26)                              |
| Cardiac Arrhythmias                                                                          | 0.054               | 0.313                       | 1.06 (0.95-1.17)                              |
| Valvular Disease                                                                             | -0.109              | 0.160                       | 0.90 (0.77-1.04)                              |
| Pulmonary Circulation Disorders                                                              | 0.164               | 0.037                       | 1.18 (1.01-1.37)                              |
| Peripheral Vascular Disorders                                                                | 0.034               | 0.542                       | 1.03 (0.93-1.15)                              |
| Hypertension, Uncomplicated                                                                  | 0.027               | 0.552                       | 1.03 (0.94-1.13)                              |
| Hypertension, Complicated                                                                    | 0.663               | <0.001                      | 1.88 (1.65-2.15)                              |
| Paralysis/Other Neurological Disorders                                                       | 0.040               | 0.579                       | 1.04 (0.90-1.20)                              |
| Chronic Pulmonary Disease                                                                    | 0.104               | 0.048                       | 1.11 (1.00-1.23)                              |
| Diabetes, Uncomplicated                                                                      | 0.044               | 0.394                       | 1.05 (0.94-1.16)                              |
| Diabetes, Complicated                                                                        | 0.497               | <0.001                      | 1.64 (1.34-2.01)                              |
| Hypothyroidism                                                                               | -0.038              | 0.555                       | 0.96 (0.85-1.09)                              |
| Liver Disease                                                                                | 0.487               | <0.001                      | 1.63 (1.43-1.85)                              |
| Peptic Ulcer Disease Excluding Bleeding                                                      | -0.084              | 0.548                       | 0.92 (0.70-1.21)                              |
| AIDS/HIV                                                                                     | -0.409              | 0.444                       | 0.66 (0.23-1.89)                              |
| Rheumatoid Arthritis / Collagen Vascular Diseases                                            | -0.174              | 0.110                       | 0.84 (0.68-1.04)                              |
| Coagulopathy                                                                                 | 0.250               | <0.001                      | 1.28 (1.12-1.47)                              |
| Lymphoma                                                                                     | 0.056               | 0.703                       | 1.05 (0.79-1.41)                              |
| Metastatic Cancer                                                                            | 0.042               | 0.566                       | 1.04 (0.90-1.20)                              |
| Solid Tumor                                                                                  | -0.087              | 0.150                       | 0.92 (0.81-1.03)                              |
| Weight Loss                                                                                  | 0.090               | 0.162                       | 1.09 (0.96-1.24)                              |
| Alcohol Abuse                                                                                | -0.240              | 0.019                       | 0.79 (0.64-0.96)                              |
| Drug Abuse                                                                                   | 0.046               | 0.707                       | 1.05 (0.83-1.33)                              |
| Psychoses                                                                                    | 0.083               | 0.620                       | 1.09 (0.78-1.51)                              |
| <b>Preoperative Chronic Medications</b>                                                      |                     |                             |                                               |
| ACEI/ARB                                                                                     | 0.056               | 0.326                       | 1.06 (0.95-1.18)                              |
| Beta Blocker                                                                                 | 0.057               | 0.282                       | 1.06 (0.95-1.17)                              |
| Preoperative hemoglobin (g/dL) <sup>§</sup>                                                  | -0.006              | <0.001                      | 0.99 (0.99-0.99)                              |
| Preoperative eGFR (mL/min/1.73 m <sup>2</sup> ) <sup>§§§</sup>                               | -0.00003            | <0.001                      | 0.99 (0.99-0.99)                              |
| Preinduction Baseline Mean Arterial Pressure (mmHg) <sup>§</sup>                             | 0.00003             | <0.001                      | 1.00 (1.00-1.00)                              |
| <b>Surgical Factors</b>                                                                      |                     |                             |                                               |
| <b>Surgical Body Region</b>                                                                  |                     |                             |                                               |
| Elevated Risk (all regions except below)                                                     | 0.865               | <0.001                      | 2.37 (2.08-2.72)                              |
| Emergent Surgery                                                                             | 0.248               | <0.001                      | 1.28 (1.30-1.56)                              |
| <b>Anesthetic Factors</b>                                                                    |                     |                             |                                               |
| <b>ASA Class</b>                                                                             |                     |                             |                                               |
| ASA Class 1                                                                                  | 0                   |                             | (reference)                                   |
| ASA Class 2                                                                                  | 0.252               | 0.164                       | 1.29 (0.90-1.84)                              |
| ASA Class 3                                                                                  | 0.726               | <0.001                      | 2.07 (1.45-2.94)                              |
| ASA Class 4                                                                                  | 1.219               | <0.001                      | 3.38 (2.35-4.86)                              |
| ASA Class 5                                                                                  | 1.602               | <0.001                      | 4.96 (2.83-8.71)                              |
| Expected Anesthesia Duration <sup>§§§</sup>                                                  | 1.283               | <0.001                      | 3.61 (2.99-4.35)                              |
| General Anesthesia                                                                           | 0.373               | <0.001                      | 1.45 (1.27-1.66)                              |
| <b>Institutional Factors</b>                                                                 |                     |                             |                                               |
| Non-university Hospital (Fixed Effect)                                                       | -0.197              | 0.324                       | 0.82 (0.55-1.21)                              |
| Institution (Random Effect), ICC (95% CI)                                                    |                     |                             | 0.21 (0.11-0.40)                              |
| <b>Intraoperative Hypotension - Relative</b>                                                 |                     |                             |                                               |
| No Absolute Hypotension (>10 minutes)                                                        | 0                   |                             | (reference)                                   |
| MAP 60-64 mmHg (>10 minutes)                                                                 | 0.459               | <0.001                      | 1.58 (0.90-1.06)                              |
| MAP 55-59 mmHg (>10 minutes)                                                                 | 0.390               | <0.001                      | 1.48 (1.02-1.21)                              |
| MAP 50-54 mmHg (>10 minutes)                                                                 | 0.194               | 0.001                       | 1.21                                          |
| MAP <50 mmHg (>10 minutes)                                                                   | 0.138               | 0.007                       | 1.15 (1.31-1.63)                              |
| Model performance <i>without</i> Absolute Intraoperative Hypotension Variables (c-statistic) |                     |                             | 0.75 (0.74-0.76)                              |

|                                                                                                                |                     |
|----------------------------------------------------------------------------------------------------------------|---------------------|
| Model performance <i>with</i> Absolute Intraoperative Hypotension Variables (c-statistic)                      | 0.75 (0.75-0.76)    |
| Model performance <i>with</i> Absolute Intraoperative Hypotension Variables (net reclassification improvement) | 0.078 (0.042-0.115) |

† Mixed effects model with anonymized institution ID as random effect; all other covariates fixed effects.

\* As determined by Elixhauser Comorbidity Enhanced ICD-9-CM/ICD-10 CM Algorithm

\*\* As determined by CKD-EPI formula, indexed by body surface area. Race assumed non-black for patients with race data unavailable.

§ Squared transformation

§§ Square root transformation

§§§ Logarithmic transformation

*ACEI = angiotensin-converting enzyme inhibitor; AIDS = autoimmune deficiency syndrome; AKI = acute kidney injury; ARB = angiotensin II receptor blocker; ASA = American Society of Anesthesiologists; CKD-EPI = Chronic Kidney Disease Epidemiology Collaboration; CPT = Current Procedural Terminology; eGFR = estimated glomerular filtration rate; HIV = human immunodeficiency virus; ICC = intraclass correlation coefficient; KDIGO = Kidney Disease: Improving Global Outcomes; WHO = World Health Organization*

Log likelihood = -9,451

**Supplemental Digital Content 7D: Comparative Acute Kidney Injury Risk Model Performance with Inclusion of Relative Intraoperative Hypotension Measures – Logistic Regression Full Model<sup>†</sup> Performed on Validation Cohort**

| Risk Factor                                                                                  | $\beta$ Coefficient | Multivariable model p-value | Adjusted Odds Ratio (95% Confidence Interval) |
|----------------------------------------------------------------------------------------------|---------------------|-----------------------------|-----------------------------------------------|
| <b>Medical Factors</b>                                                                       |                     |                             |                                               |
| Patient Age (years) <sup>§</sup>                                                             | 0.000033            | 0.019                       | 1.00 (1.00-1.00)                              |
| BMI (kg/m <sup>2</sup> ) <sup>§§</sup>                                                       | 0.194               | <0.001                      | 1.21 (1.15-1.28)                              |
| Male Gender                                                                                  | 0.342               | <0.001                      | 1.41 (1.30-1.53)                              |
| <b>Patient Medical History *</b>                                                             |                     |                             |                                               |
| Congestive Heart Failure                                                                     | 0.102               | 0.117                       | 1.11 (0.97-1.26)                              |
| Cardiac Arrhythmias                                                                          | 0.052               | 0.331                       | 1.05 (0.95-1.17)                              |
| Valvular Disease                                                                             | -0.115              | 0.140                       | 0.89 (0.77-1.04)                              |
| Pulmonary Circulation Disorders                                                              | 0.165               | 0.036                       | 1.18 (1.01-1.38)                              |
| Peripheral Vascular Disorders                                                                | 0.035               | 0.526                       | 1.04 (0.93-1.15)                              |
| Hypertension, Uncomplicated                                                                  | 0.026               | 0.569                       | 1.03 (0.94-1.12)                              |
| Hypertension, Complicated                                                                    | 0.633               | <0.001                      | 1.88 (1.65-2.15)                              |
| Paralysis/Other Neurological Disorders                                                       | 0.039               | 0.586                       | 1.04 (0.90-1.20)                              |
| Chronic Pulmonary Disease                                                                    | 0.102               | 0.051                       | 1.11 (1.00-1.23)                              |
| Diabetes, Uncomplicated                                                                      | 0.045               | 0.388                       | 1.05 (0.95-1.16)                              |
| Diabetes, Complicated                                                                        | 0.501               | <0.001                      | 1.65 (1.35-2.02)                              |
| Hypothyroidism                                                                               | -0.037              | 0.562                       | 0.96 (0.85-1.09)                              |
| Liver Disease                                                                                | 0.491               | <0.001                      | 1.63 (1.44-1.85)                              |
| Peptic Ulcer Disease Excluding Bleeding                                                      | -0.087              | 0.531                       | 0.92 (0.70-1.20)                              |
| AIDS/HIV                                                                                     | -0.384              | 0.473                       | 0.68 (0.24-1.94)                              |
| Rheumatoid Arthritis / Collagen Vascular Diseases                                            | -0.179              | 0.100                       | 0.84 (0.68-1.04)                              |
| Coagulopathy                                                                                 | 0.250               | <0.001                      | 1.28 (1.12-1.47)                              |
| Lymphoma                                                                                     | 0.043               | 0.767                       | 1.04 (0.79-1.39)                              |
| Metastatic Cancer                                                                            | 0.047               | 0.526                       | 1.05 (0.91-1.21)                              |
| Solid Tumor                                                                                  | -0.091              | 0.133                       | 0.91 (0.81-1.03)                              |
| Weight Loss                                                                                  | 0.100               | 0.129                       | 1.10 (0.97-1.25)                              |
| Alcohol Abuse                                                                                | -0.240              | 0.018                       | 0.79 (0.64-0.96)                              |
| Drug Abuse                                                                                   | 0.034               | 0.781                       | 1.03 (0.82-1.31)                              |
| Psychoses                                                                                    | 0.082               | 0.622                       | 1.09 (0.78-1.51)                              |
| <b>Preoperative Chronic Medications</b>                                                      |                     |                             |                                               |
| ACEI/ARB                                                                                     | 0.057               | 0.319                       | 1.06 (0.95-1.18)                              |
| Beta Blocker                                                                                 | 0.055               | 0.299                       | 1.06 (0.95-1.17)                              |
| Preoperative hemoglobin (g/dL) <sup>§</sup>                                                  | -0.006              | <0.001                      | 0.99 (0.99-0.99)                              |
| Preoperative eGFR (mL/min/1.73 m <sup>2</sup> ) <sup>*** §</sup>                             | -0.0003             | <0.001                      | 0.99 (0.99-0.99)                              |
| Preinduction Baseline Mean Arterial Pressure (mmHg) <sup>§</sup>                             | -0.00000677         | 0.460                       | 1.00 (1.00-1.00)                              |
| <b>Surgical Factors</b>                                                                      |                     |                             |                                               |
| <b>Surgical Body Region</b>                                                                  |                     |                             |                                               |
| Elevated Risk (all regions except below)                                                     | 0.866               | <0.001                      | 2.38 (2.08-2.72)                              |
| Emergent Surgery                                                                             | 0.255               | <0.001                      | 1.29 (1.13-1.47)                              |
| <b>Anesthetic Factors</b>                                                                    |                     |                             |                                               |
| <b>ASA Class</b>                                                                             |                     |                             |                                               |
| ASA Class 1                                                                                  | 0                   |                             | (reference)                                   |
| ASA Class 2                                                                                  | 0.249               | 0.170                       | 1.28 (0.90-1.83)                              |
| ASA Class 3                                                                                  | 0.719               | <0.001                      | 2.05 (1.44-2.92)                              |
| ASA Class 4                                                                                  | 1.206               | <0.001                      | 3.34 (2.32-4.80)                              |
| ASA Class 5                                                                                  | 1.608               | <0.001                      | 4.99 (2.85-8.76)                              |
| Expected Anesthesia Duration <sup>§§§</sup>                                                  | 1.332               | <0.001                      | 3.79 (3.14-4.57)                              |
| General Anesthesia                                                                           | 0.359               | <0.001                      | 1.43 (1.25-1.64)                              |
| <b>Institutional Factors</b>                                                                 |                     |                             |                                               |
| Non-university Hospital (Fixed Effect)                                                       | -0.197              | 0.325                       | 0.82 (0.55-1.22)                              |
| Institution (Random Effect), ICC (95% CI)                                                    |                     |                             | 0.21 (0.11-0.40)                              |
| <b>Intraoperative Hypotension - Relative</b>                                                 |                     |                             |                                               |
| No Relative Hypotension                                                                      | 0                   |                             | (reference)                                   |
| MAP 20-30% below baseline (>10 minutes)                                                      | -0.012              | 0.829                       | 0.99 (0.88-1.11)                              |
| MAP 30-40% below baseline (>10 minutes)                                                      | 0.121               | 0.052                       | 1.13 (0.99-1.28)                              |
| MAP $\geq$ 40% below baseline (>10 minutes)                                                  | 0.339               | <0.001                      | 1.40 (1.21-1.63)                              |
| Model performance <i>without</i> Relative Intraoperative Hypotension Variables (c-statistic) |                     |                             | 0.75 (0.74-0.76)                              |
| Model performance <i>with</i> Relative Intraoperative Hypotension Variables (c-statistic)    |                     |                             | 0.75 (0.74-0.76)                              |

|                                                                                                                |                     |
|----------------------------------------------------------------------------------------------------------------|---------------------|
| Model performance <i>with</i> Relative Intraoperative Hypotension Variables (net reclassification improvement) | 0.132 (0.095-0.168) |
|----------------------------------------------------------------------------------------------------------------|---------------------|

† Mixed effects model with anonymized institution ID as random effect; all other covariates fixed effects.

\* As determined by Elixhauser Comorbidity Enhanced ICD-9-CM/ICD-10 CM Algorithm

\*\* As determined by CKD-EPI formula, indexed by body surface area. Race assumed non-black for patients with race data unavailable.

§ Squared transformation

§§ Square root transformation

§§§ Logarithmic transformation

*ACEI = angiotensin-converting enzyme inhibitor; AIDS = autoimmune deficiency syndrome; AKI = acute kidney injury; ARB = angiotensin II receptor blocker; ASA = American Society of Anesthesiologists; CKD-EPI = Chronic Kidney Disease Epidemiology Collaboration; CPT = Current Procedural Terminology; eGFR = estimated glomerular filtration rate; HIV = human immunodeficiency virus; ICC = intraclass correlation coefficient; KDIGO = Kidney Disease: Improving Global Outcomes; WHO = World Health Organization*

*Log likelihood = -9,457.37*
