# Supplementary material
Source: PubMed Central journal article supplement (PMC7015776)
Supplement: NIHMS1062534-supplement-10.pdf [file NIHMS1062534-supplement-10.pdf]

**Supplemental Digital Content 10A: Sensitivity Analysis: Multivariable Analysis of Preoperative Characteristics and Postoperative Acute Kidney Injury – Logistic Regression Full Model<sup>†</sup> Performed on Derivation Cohort: Cases with Missing Postoperative Creatinine Assumed Normal Renal Function**

| Risk Factor                                                      | $\beta$ Coefficient | Multivariable model p-value | Adjusted Odds Ratio (95% Confidence Interval) <sup>†</sup> |
|------------------------------------------------------------------|---------------------|-----------------------------|------------------------------------------------------------|
| <b>Medical Factors</b>                                           |                     |                             |                                                            |
| Patient Age (years) <sup>§</sup>                                 | 0.00002             | 0.02                        | 1.00002 (1.00000-1.00004)                                  |
| BMI (kg/m <sup>2</sup> ) <sup>§§</sup>                           | 0.187               | <0.001                      | 1.21 (1.16-1.25)                                           |
| Male Gender                                                      | 0.368               | <0.001                      | 1.44 (1.35-1.52)                                           |
| <b>Patient Medical History<sup>*</sup></b>                       |                     |                             |                                                            |
| Congestive Heart Failure                                         | 0.037               | 0.42                        | 1.04 (0.95-1.14)                                           |
| Cardiac Arrhythmias                                              | 0.085               | 0.03                        | 1.09 (1.01-1.17)                                           |
| Valvular Disease                                                 | -0.062              | 0.27                        | 0.94 (0.84-1.05)                                           |
| Pulmonary Circulation Disorders                                  | 0.140               | 0.01                        | 1.15 (1.03-1.29)                                           |
| Peripheral Vascular Disorders                                    | 0.077               | 0.05                        | 1.08 (0.99-1.17)                                           |
| Hypertension, Uncomplicated                                      | 0.088               | 0.01                        | 1.09 (1.02-1.17)                                           |
| Hypertension, Complicated                                        | 0.619               | <0.001                      | 1.86 (1.69-2.04)                                           |
| Paralysis/Other Neurological Disorders                           | 0.073               | 0.16                        | 1.08 (0.97-1.19)                                           |
| Chronic Pulmonary Disease                                        | 0.041               | 0.28                        | 1.04 (0.97-1.12)                                           |
| Diabetes, Uncomplicated                                          | 0.019               | 0.62                        | 1.02 (0.95-1.10)                                           |
| Diabetes, Complicated                                            | 0.442               | <0.001                      | 1.56 (1.34-1.80)                                           |
| Hypothyroidism                                                   | -0.117              | 0.01                        | 0.89 (0.81-0.97)                                           |
| Liver Disease                                                    | 0.515               | <0.001                      | 1.67 (1.52-1.83)                                           |
| Peptic Ulcer Disease Excluding Bleeding                          | 0.074               | 0.44                        | 1.08 (0.89-1.30)                                           |
| AIDS/HIV                                                         | 0.260               | 0.39                        | 1.30 (0.71-2.36)                                           |
| Rheumatoid Arthritis / Collagen Vascular Diseases                | -0.015              | 0.83                        | 0.98 (0.85-1.14)                                           |
| Coagulopathy                                                     | 0.358               | <0.001                      | 1.43 (1.30-1.57)                                           |
| Lymphoma                                                         | 0.048               | 0.64                        | 1.05 (0.86-1.29)                                           |
| Metastatic Cancer                                                | 0.019               | 0.72                        | 1.02 (0.92-1.13)                                           |
| Solid Tumor                                                      | -0.105              | 0.02                        | 0.90 (0.83-0.98)                                           |
| Weight Loss                                                      | 0.182               | <0.001                      | 1.20 (1.10-1.31)                                           |
| Alcohol Abuse                                                    | -0.218              | 0.003                       | 0.80 (0.70-0.93)                                           |
| Drug Abuse                                                       | -0.045              | 0.62                        | 0.96 (0.80-1.14)                                           |
| Psychoses                                                        | 0.133               | 0.25                        | 1.14 (0.91-1.44)                                           |
| <b>Preoperative Chronic Medications</b>                          |                     |                             |                                                            |
| ACEI/ARB                                                         | 0.052               | 0.21                        | 1.05 (0.97-1.14)                                           |
| Beta Blocker                                                     | -0.014              | 0.72                        | 0.99 (0.92-1.06)                                           |
| Preoperative hemoglobin (g/dL) <sup>§</sup>                      | -0.007              | <0.001                      | 0.99 (0.99-0.99)                                           |
| Preoperative eGFR (mL/min/1.73 m <sup>2</sup> ) <sup>** §</sup>  | -0.00004            | <0.001                      | 0.99 (0.99-0.99)                                           |
| Preinduction Baseline Mean Arterial Pressure (mmHg) <sup>§</sup> | -0.000001           | 0.82                        | 1.00 (0.99-1.00)                                           |
| <b>Surgical Factors</b>                                          |                     |                             |                                                            |
| <b>Surgical Body Region</b>                                      |                     |                             |                                                            |
| Elevated Risk (all regions except below)                         | 0.875               | <0.001                      | 2.40 (2.17-2.65)                                           |
| Emergent Surgery                                                 | 0.393               | <0.001                      | 1.48 (1.35-1.63)                                           |
| <b>Anesthetic Factors</b>                                        |                     |                             |                                                            |
| <b>ASA Class</b>                                                 |                     |                             |                                                            |
| ASA Class 1                                                      | 0                   |                             | (reference)                                                |
| ASA Class 2                                                      | 0.242               | 0.06                        | 1.27 (0.99-1.64)                                           |
| ASA Class 3                                                      | 0.971               | <0.001                      | 2.64 (2.06-3.39)                                           |
| ASA Class 4                                                      | 1.398               | <0.001                      | 4.05 (3.13-5.24)                                           |
| ASA Class 5                                                      | 1.862               | <0.001                      | 6.44 (4.38-9.46)                                           |
| Expected Anesthesia Duration <sup>§§§</sup>                      | 0.709               | <0.001                      | 2.03 (1.92-2.15)                                           |
| General Anesthesia                                               | 0.327               | <0.001                      | 1.39 (1.27-1.52)                                           |
| <b>Institutional Factors</b>                                     |                     |                             |                                                            |
| Non-university Hospital (Fixed Effect)                           | 0.014               | 0.93                        | 1.01 (0.75-1.38)                                           |
| Institution (Random Effect), ICC (95% CI)                        |                     |                             | 0.20 (0.11-0.34)                                           |
| Original Model performance (c-statistic)                         |                     |                             | 0.75 (0.74-0.76)                                           |
| New Model performance (c-statistic)                              |                     |                             | 0.78 (0.78-0.79)                                           |

<sup>†</sup> Mixed effects model with anonymized institution ID as random effect; all other covariates fixed effects.

\* As determined by Elixhauser Comorbidity Enhanced ICD-9-CM/ICD-10 CM Algorithm

\*\* As determined by CKD-EPI formula, indexed by body surface area. Race assumed non-black for patients with race data unavailable.

§ Squared transformation

§§ Square root transformation

§§§ Logarithmic transformation

*ACEI = angiotensin-converting enzyme inhibitor; AIDS = autoimmune deficiency syndrome; AKI = acute kidney injury; ARB = angiotensin II receptor blocker; ASA = American Society of Anesthesiologists; CKD-EPI = Chronic Kidney Disease Epidemiology Collaboration; CPT = Current Procedural Terminology; eGFR = estimated glomerular filtration rate; HIV = human immunodeficiency virus; ICC = intraclass correlation coefficient; KDIGO = Kidney Disease: Improving Global Outcomes; WHO = World Health Organization*

*Log likelihood = -19,021.894*

**Supplemental Digital Content 10B: Sensitivity Analysis: Risk of Acute Kidney Injury Associated with Intraoperative Hypotension by Preoperative Risk Quartile – Cases with Missing Postoperative Creatinine Assumed Normal Renal Function**

| Absolute Hypotension - Derivation Cohort                      |                                                      |                                                         |                                                       |                                                          |
|---------------------------------------------------------------|------------------------------------------------------|---------------------------------------------------------|-------------------------------------------------------|----------------------------------------------------------|
| Intraoperative Hypotension <sup>†</sup> - Absolute MAP Values | Quartile 1*<br>Low Preoperative Risk<br>(N = 23,390) | Quartile 2*<br>Medium Preoperative Risk<br>(N = 23,390) | Quartile 3*<br>High Preoperative Risk<br>(N = 23,389) | Quartile 4*<br>Highest Preoperative Risk<br>(N = 23,390) |
| No Absolute Hypotension                                       | (reference)<br>n = 14,628                            | (reference)<br>n = 14,278                               | (reference)<br>n = 14,152                             | (reference)<br>n = 12,274                                |
| MAP 60-64 mmHg                                                | 1.10 (0.79-1.54)<br>n = 4,657                        | 1.27 (1.04-1.55)<br><b>Increased AKI</b><br>n = 4,729   | 1.18 (1.02-1.45)<br><b>Increased AKI</b><br>n = 4,700 | 1.19 (1.08-1.30)<br><b>Increased AKI</b><br>n = 5,133    |
| MAP 55-59 mmHg                                                | 1.06 (0.70-1.60)<br>n = 2,801                        | 1.06 (0.82-1.37)<br>n = 2,855                           | 1.21 (1.02-1.45)<br><b>Increased AKI</b><br>n = 2,898 | 1.39 (1.26-1.54)<br><b>Increased AKI</b><br>n = 3,624    |
| MAP 50-54 mmHg                                                | 1.33 (0.71-2.47)<br>n = 886                          | 1.08 (0.72-1.62)<br>n = 1,015                           | 1.39 (1.07-1.80)<br><b>Increased AKI</b><br>n = 1,011 | 1.72 (1.50-1.98)<br><b>Increased AKI</b><br>n = 1,393    |
| MAP <50 mmHg                                                  | 2.04 (0.99-4.20)<br>n = 418                          | 1.83 (1.18-2.85)<br><b>Increased AKI</b><br>n = 513     | 1.73 (1.29-2.33)<br><b>Increased AKI</b><br>n = 628   | 1.98 (1.69-2.32)<br><b>Increased AKI</b><br>n = 966      |

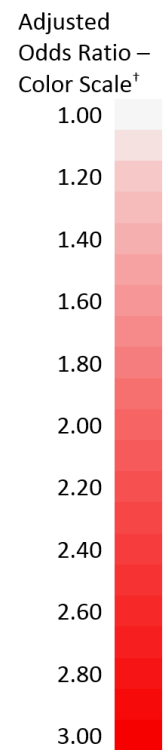

| Relative Hypotension - Derivation Cohort                      |                                                      |                                                         |                                                       |                                                          |
|---------------------------------------------------------------|------------------------------------------------------|---------------------------------------------------------|-------------------------------------------------------|----------------------------------------------------------|
| Intraoperative Hypotension <sup>†</sup> – Relative MAP Values | Quartile 1*<br>Low Preoperative Risk<br>(N = 23,390) | Quartile 2*<br>Medium Preoperative Risk<br>(N = 23,390) | Quartile 3*<br>High Preoperative Risk<br>(N = 23,389) | Quartile 4*<br>Highest Preoperative Risk<br>(N = 23,390) |
| No Relative Hypotension                                       | (reference)<br>n = 13,379                            | (reference)<br>n = 11,167                               | (reference)<br>n = 9,633                              | (reference)<br>n = 9,104                                 |
| MAP 20-30% Below Baseline                                     | 1.17 (0.84-1.64)<br>n = 3,737                        | 1.02 (0.82-1.27)<br>n = 4,592                           | 0.88 (0.75-1.03)<br>n = 5,087                         | 0.86 (0.79-0.95)<br><b>Decreased AKI</b><br>n = 5,378    |
| MAP 30-40% Below Baseline                                     | 0.93 (0.65-1.35)<br>n = 3,829                        | 1.09 (0.88-1.37)<br>n = 4,542                           | 1.07 (0.92-1.25)<br>n = 5,143                         | 0.92 (0.84-1.02)<br>n = 5,052                            |
| MAP > 40% Below Baseline                                      | 1.35 (0.93-1.98)<br>n = 2,445                        | 1.40 (1.11-1.77)<br><b>Increased AKI</b><br>n = 3,089   | 1.34 (1.13-1.58)<br><b>Increased AKI</b><br>n = 3,526 | 1.17 (1.05-1.29)<br><b>Increased AKI</b><br>n = 3,856    |

Values presented as adjusted odds ratio and 95% confidence interval.  
 \* Patients were stratified by risk of postoperative AKI using the full multivariable model.  
<sup>†</sup> Color scale used only for adjusted odds ratios demonstrating statistically significant associations.  
 Regression within each quartile included all four blood pressure ranges and operative duration (log transformed).  
 AKI = acute kidney injury; MAP = mean arterial pressure
