# Supplementary material
Source: PubMed Central journal article supplement (PMC7015776)
Supplement: NIHMS1062534-supplement-11.pdf [file NIHMS1062534-supplement-11.pdf]

**Supplemental Digital Content 11A: Sensitivity Analysis: Multivariable Analysis of Preoperative Characteristics and Postoperative Acute Kidney Injury – Logistic Regression Full Model<sup>†</sup> Performed on Derivation Cohort: 30-Day Index Cases**

| Risk Factor                                                      | $\beta$ Coefficient | Multivariable model p-value | Adjusted Odds Ratio (95% Confidence Interval) <sup>†</sup> |
|------------------------------------------------------------------|---------------------|-----------------------------|------------------------------------------------------------|
| <b>Medical Factors</b>                                           |                     |                             |                                                            |
| Patient Age (years) <sup>§</sup>                                 | 0.000006            | 0.54                        | 1.00 (0.99-1.00)                                           |
| BMI (kg/m <sup>2</sup> ) <sup>§§</sup>                           | 0.182               | <0.001                      | 1.20 (1.16-1.25)                                           |
| Male Gender                                                      | 0.315               | <0.001                      | 1.37 (1.29-1.45)                                           |
| <b>Patient Medical History <sup>*</sup></b>                      |                     |                             |                                                            |
| Congestive Heart Failure                                         | 0.016               | 0.74                        | 1.02 (0.93-1.11)                                           |
| Cardiac Arrhythmias                                              | 0.091               | 0.02                        | 1.10 (1.02-1.18)                                           |
| Valvular Disease                                                 | -0.005              | 0.93                        | 0.99 (0.89-1.11)                                           |
| Pulmonary Circulation Disorders                                  | 0.147               | 0.01                        | 1.16 (1.04-1.29)                                           |
| Peripheral Vascular Disorders                                    | 0.079               | 0.05                        | 1.08 (1.00-1.17)                                           |
| Hypertension, Uncomplicated                                      | 0.010               | 0.77                        | 1.01 (0.95-1.08)                                           |
| Hypertension, Complicated                                        | 0.499               | <0.001                      | 1.65 (1.50-1.81)                                           |
| Paralysis/Other Neurological Disorders                           | 0.069               | 0.18                        | 1.07 (0.97-1.18)                                           |
| Chronic Pulmonary Disease                                        | 0.002               | 0.96                        | 1.00 (0.93-1.08)                                           |
| Diabetes, Uncomplicated                                          | 0.049               | 0.18                        | 1.05 (0.98-1.13)                                           |
| Diabetes, Complicated                                            | 0.391               | <0.001                      | 1.48 (1.27-1.72)                                           |
| Hypothyroidism                                                   | -0.111              | 0.02                        | 0.90 (0.82-0.98)                                           |
| Liver Disease                                                    | 0.472               | <0.001                      | 1.60 (1.47-1.75)                                           |
| Peptic Ulcer Disease Excluding Bleeding                          | -0.0004             | 1.00                        | 1.00 (0.82-1.21)                                           |
| AIDS/HIV                                                         | 0.228               | 0.43                        | 1.26 (0.72-2.20)                                           |
| Rheumatoid Arthritis / Collagen Vascular Diseases                | -0.071              | 0.34                        | 0.93 (0.80-1.08)                                           |
| Coagulopathy                                                     | 0.446               | <0.001                      | 1.56 (1.42-1.71)                                           |
| Lymphoma                                                         | 0.067               | 0.51                        | 1.07 (0.88-1.31)                                           |
| Metastatic Cancer                                                | 0.006               | 0.91                        | 1.01 (0.91-1.12)                                           |
| Solid Tumor                                                      | -0.033              | 0.45                        | 0.97 (0.89-1.05)                                           |
| Weight Loss                                                      | 0.177               | <0.001                      | 1.19 (1.09-1.30)                                           |
| Alcohol Abuse                                                    | -0.161              | 0.02                        | 0.85 (0.74-0.98)                                           |
| Drug Abuse                                                       | -0.018              | 0.84                        | 0.98 (0.83-1.16)                                           |
| Psychoses                                                        | -0.077              | 0.54                        | 0.93 (0.73-1.18)                                           |
| <b>Preoperative Chronic Medications</b>                          |                     |                             |                                                            |
| ACEI/ARB                                                         | 0.040               | 0.34                        | 1.04 (0.96-1.13)                                           |
| Beta Blocker                                                     | 0.002               | 0.97                        | 1.00 (0.93-1.08)                                           |
| Preoperative hemoglobin (g/dL) <sup>§</sup>                      | -0.007              | <0.001                      | 0.99 (0.99-0.99)                                           |
| Preoperative eGFR (mL/min/1.73 m <sup>2</sup> ) <sup>** §</sup>  | -0.00002            | <0.001                      | 0.99 (0.99-0.99)                                           |
| Preinduction Baseline Mean Arterial Pressure (mmHg) <sup>§</sup> | 0.00001             | 0.06                        | 1.00 (1.00-1.00)                                           |
| <b>Surgical Factors</b>                                          |                     |                             |                                                            |
| <b>Surgical Body Region</b>                                      |                     |                             |                                                            |
| Elevated Risk                                                    | 0.896               | <0.001                      | 2.45 (2.21-2.71)                                           |
| Emergent Surgery                                                 | 0.395               | <0.001                      | 1.48 (1.35-1.63)                                           |
| <b>Anesthetic Factors</b>                                        |                     |                             |                                                            |
| <b>ASA Class</b>                                                 |                     |                             |                                                            |
| ASA Class 1                                                      | 0                   |                             | (reference)                                                |
| ASA Class 2                                                      | 0.030               | 0.81                        | 1.03 (0.80-1.32)                                           |
| ASA Class 3                                                      | 0.733               | <0.001                      | 2.08 (1.63-2.66)                                           |
| ASA Class 4                                                      | 1.133               | <0.001                      | 3.10 (2.41-4.00)                                           |
| ASA Class 5                                                      | 1.809               | <0.001                      | 6.10 (4.11-9.05)                                           |
| Expected Anesthesia Duration <sup>§§§</sup>                      | 1.112               | <0.001                      | 3.06 (2.69-3.47)                                           |
| General Anesthesia                                               | 0.295               | <0.001                      | 1.34 (1.23-1.47)                                           |
| <b>Institutional Factors</b>                                     |                     |                             |                                                            |
| Non-university Hospital (Fixed Effect)                           | 0.021               | 0.89                        | 1.02 (0.76-1.37)                                           |
| Institution (Random Effect), ICC (95% CI)                        |                     |                             | 0.16 (0.09-0.30)                                           |
| Original Model performance (c-statistic)                         |                     |                             | 0.75 (0.74-0.76)                                           |
| New Model performance (c-statistic)                              |                     |                             | 0.76 (0.75-0.76)                                           |

<sup>†</sup> Mixed effects model with anonymized institution ID as random effect; all other covariates fixed effects.

\* As determined by Elixhauser Comorbidity Enhanced ICD-9-CM/ICD-10 CM Algorithm

\*\* As determined by CKD-EPI formula, indexed by body surface area. Race assumed non-black for patients with race data unavailable.

§ Squared transformation

§§ Square root transformation

§§§ Logarithmic transformation

*ACEI = angiotensin-converting enzyme inhibitor; AIDS = autoimmune deficiency syndrome; AKI = acute kidney injury; ARB = angiotensin II receptor blocker; ASA = American Society of Anesthesiologists; CKD-EPI = Chronic Kidney Disease Epidemiology Collaboration; CPT = Current Procedural Terminology; eGFR = estimated glomerular filtration rate; HIV = human immunodeficiency virus; ICC = intraclass correlation coefficient; KDIGO = Kidney Disease: Improving Global Outcomes; WHO = World Health Organization*

*Log likelihood = -18,144.62*

## Supplemental Digital Content 11B: Sensitivity Analysis: Risk of Acute Kidney Injury Associated with

### Intraoperative Hypotension by Preoperative Risk Quartile – 30-Day Index Cases

| Absolute Hypotension - Derivation Cohort                      |                                                |                                                     |                                                       |                                                       | Adjusted Odds Ratio – Color Scale <sup>†</sup> |
|---------------------------------------------------------------|------------------------------------------------|-----------------------------------------------------|-------------------------------------------------------|-------------------------------------------------------|------------------------------------------------|
| Intraoperative Hypotension <sup>†</sup> - Absolute MAP Values | Quartile 1* Low Preoperative Risk (N = 17,715) | Quartile 2* Medium Preoperative Risk (N = 17,715)   | Quartile 3* High Preoperative Risk (N = 17,715)       | Quartile 4* Highest Preoperative Risk (N = 17,715)    |                                                |
| No Absolute Hypotension                                       | (reference)<br>n = 10,113                      | (reference)<br>n = 10,303                           | (reference)<br>n = 10,318                             | (reference)<br>n = 9,274                              |                                                |
| MAP 60-64 mmHg                                                | 0.85 (0.63-1.14)<br>n = 3,867                  | 1.17 (0.97-1.42)<br>n = 3,726                       | 1.07 (0.93-1.24)<br>n = 3,640                         | 1.10 (0.99-1.21)<br>n = 3,848                         |                                                |
| MAP 55-59 mmHg                                                | 0.75 (0.52-1.09)<br>n = 2,474                  | 1.16 (0.92-1.45)<br>n = 2,368                       | 1.20 (1.02-1.41)<br><b>Increased AKI</b><br>n = 2,371 | 1.37 (1.23-1.52)<br><b>Increased AKI</b><br>n = 2,743 |                                                |
| MAP 50-54 mmHg                                                | 1.14 (0.69-1.89)<br>n = 858                    | 1.34 (0.96-1.87)<br>n = 850                         | 1.42 (1.12-1.80)<br><b>Increased AKI</b><br>n = 829   | 1.55 (1.34-1.80)<br><b>Increased AKI</b><br>n = 1,100 |                                                |
| MAP <50 mmHg                                                  | 1.38 (0.73-2.64)<br>n = 403                    | 1.86 (1.27-2.72)<br><b>Increased AKI</b><br>n = 468 | 1.55 (1.18-2.04)<br><b>Increased AKI</b><br>n = 557   | 2.10 (1.78-2.48)<br><b>Increased AKI</b><br>n = 750   |                                                |

  

| Relative Hypotension - Derivation Cohort                      |                                                       |                                                       |                                                       |                                                       |
|---------------------------------------------------------------|-------------------------------------------------------|-------------------------------------------------------|-------------------------------------------------------|-------------------------------------------------------|
| Intraoperative Hypotension <sup>†</sup> – Relative MAP Values | Quartile 1* Low Preoperative Risk (N = 17,715)        | Quartile 2* Medium Preoperative Risk (N = 17,715)     | Quartile 3* High Preoperative Risk (N = 17,715)       | Quartile 4* Highest Preoperative Risk (N = 17,715)    |
| No Relative Hypotension                                       | (reference)<br>n = 4,865                              | (reference)<br>n = 5,478                              | (reference)<br>n = 5,762                              | (reference)<br>n = 6,491                              |
| MAP 20-30% Below Baseline                                     | 0.87 (0.65-1.18)<br>n = 4,708                         | 0.86 (0.71-1.06)<br>n = 4,501                         | 0.95 (0.82-1.10)<br>n = 4,517                         | 0.84 (0.76-0.93)<br><b>Decreased AKI</b><br>n = 4,299 |
| MAP 30-40% Below Baseline                                     | 0.91 (0.67-1.23)<br>n = 4,872                         | 0.93 (0.76-1.14)<br>n = 4,613                         | 1.00 (0.86-1.16)<br>n = 4,357                         | 0.90 (0.81-0.99)<br><b>Decreased AKI</b><br>n = 3,922 |
| MAP > 40% Below Baseline                                      | 1.41 (1.03-1.91)<br><b>Increased AKI</b><br>n = 3,270 | 1.30 (1.05-1.60)<br><b>Increased AKI</b><br>n = 3,123 | 1.20 (1.02-1.41)<br><b>Increased AKI</b><br>n = 3,079 | 1.10 (0.98-1.22)<br>n = 3,003                         |

Values presented as adjusted odds ratio and 95% confidence interval.

\* Patients were stratified by risk of postoperative AKI using the full multivariable model.

<sup>†</sup> Color scale used only for adjusted odds ratios demonstrating statistically significant associations.

Regression within each quartile included all four blood pressure ranges and operative duration (log transformed).

AKI = acute kidney injury; MAP = mean arterial pressure
