# Supplementary material
Source: PubMed Central journal article supplement (PMC7015776)
Supplement: NIHMS1062534-supplement-12.pdf [file NIHMS1062534-supplement-12.pdf]

**Supplemental Digital Content 12A: Sensitivity Analysis: Multivariable Analysis of Preoperative Characteristics and Postoperative Acute Kidney Injury – Missing Data Handled via Multiple Imputation**

| Risk Factor                                                      | $\beta$ Coefficient | Multivariable model p-value | 95% Confidence Interval † |
|------------------------------------------------------------------|---------------------|-----------------------------|---------------------------|
| <b>Medical Factors</b>                                           |                     |                             |                           |
| Patient Age (years) <sup>§</sup>                                 | 0.0000007           | 0.29                        | -0.0000006 - 0.0000002    |
| BMI (kg/m <sup>2</sup> ) <sup>§§</sup>                           | 0.017               | <0.001                      | 0.01 - 0.02               |
| Male Gender                                                      | 0.027               | <0.001                      | 0.023 - 0.303             |
| <b>Patient Medical History *</b>                                 |                     |                             |                           |
| Congestive Heart Failure                                         | 0.018               | <0.001                      | 0.010 - 0.026             |
| Cardiac Arrhythmias                                              | 0.010               | <0.001                      | 0.005 - 0.016             |
| Valvular Disease                                                 | 0.007               | 0.12                        | -0.002 - 0.016            |
| Pulmonary Circulation Disorders                                  | 0.016               | 0.001                       | 0.007 - 0.026             |
| Peripheral Vascular Disorders                                    | 0.014               | <0.001                      | 0.008 - 0.020             |
| Hypertension, Uncomplicated                                      | -0.0008             | 0.73                        | -0.005 - 0.004            |
| Hypertension, Complicated                                        | 0.077               | <0.001                      | 0.068 - 0.086             |
| Paralysis/Other Neurological Disorders                           | 0.009               | 0.01                        | 0.002 - 0.016             |
| Chronic Pulmonary Disease                                        | 0.0008              | 0.77                        | -0.005 - 0.006            |
| Diabetes, Uncomplicated                                          | 0.008               | 0.01                        | 0.002 - 0.013             |
| Diabetes, Complicated                                            | 0.065               | <0.001                      | 0.050 - 0.081             |
| Hypothyroidism                                                   | -0.010              | 0.01                        | -0.016 - -0.003           |
| Liver Disease                                                    | 0.055               | <0.001                      | 0.047 - 0.062             |
| Peptic Ulcer Disease Excluding Bleeding                          | 0.002               | 0.75                        | -0.013 - 0.018            |
| AIDS/HIV                                                         | 0.036               | 0.09                        | -0.006 - 0.078            |
| Rheumatoid Arthritis / Collagen Vascular Diseases                | -0.007              | 0.21                        | -0.017 - 0.004            |
| Coagulopathy                                                     | 0.062               | <0.001                      | 0.054 - 0.070             |
| Lymphoma                                                         | 0.005               | 0.52                        | -0.010 - 0.020            |
| Metastatic Cancer                                                | -0.0003             | 0.94                        | -0.007 - 0.007            |
| Solid Tumor                                                      | -0.0006             | 0.84                        | -0.006 - 0.005            |
| Weight Loss                                                      | 0.029               | <0.001                      | 0.022 - 0.035             |
| Alcohol Abuse                                                    | -0.013              | 0.02                        | -0.023 - -0.002           |
| Drug Abuse                                                       | -0.003              | 0.68                        | -0.015 - 0.010            |
| Psychoses                                                        | -0.013              | 0.14                        | -0.030 - 0.004            |
| <b>Preoperative Chronic Medications</b>                          |                     |                             |                           |
| ACEI/ARB                                                         | -0.004              | 0.16                        | -0.010 - 0.002            |
| Beta Blocker                                                     | -0.009              | 0.002                       | -0.014 - -0.003           |
| Preoperative hemoglobin (g/dL) <sup>§</sup>                      | -0.0004             | <0.001                      | -0.0005 - -0.0004         |
| Preoperative eGFR (mL/min/1.73 m <sup>2</sup> ) <sup>§§§</sup>   | -0.000003           | <0.001                      | -0.000003 - -0.000002     |
| Preinduction Baseline Mean Arterial Pressure (mmHg) <sup>§</sup> | 0.0000003           | 0.36                        | -0.0000003 - 0.0000001    |
| <b>Surgical Factors</b>                                          |                     |                             |                           |
| <b>Surgical Body Region</b>                                      |                     |                             |                           |
| Elevated Risk                                                    | 0.047               | <0.001                      | 0.042 - 0.052             |
| Emergent Surgery                                                 | 0.030               | <0.001                      | 0.024 - 0.036             |
| <b>Anesthetic Factors</b>                                        |                     |                             |                           |
| <b>ASA Class</b>                                                 |                     |                             |                           |
| ASA Class 1                                                      | 0                   |                             | (reference)               |
| ASA Class 2                                                      | 0.0003              | 0.96                        | -0.010 - 0.011            |
| ASA Class 3                                                      | 0.025               | <0.001                      | 0.015 - 0.036             |
| ASA Class 4                                                      | 0.080               | <0.001                      | 0.068 - 0.092             |
| ASA Class 5                                                      | 0.214               | <0.001                      | 0.146 - 0.248             |
| Expected Anesthesia Duration <sup>§§§</sup>                      | 0.091               | <0.001                      | 0.083 - 0.100             |
| General Anesthesia                                               | 0.024               | <0.001                      | 0.018 - 0.030             |
| <b>Institutional Factors</b>                                     |                     |                             |                           |
| Non-university Hospital (Fixed Effect)                           | 0.004               | 0.64                        | -0.014 - 0.023            |
| Institution (Random Effect), ICC (95% CI)                        |                     |                             | 0.012 (0.006-0.022)       |
| Original Model performance (c-statistic)                         |                     |                             | 0.75 (0.74-0.76)          |
| New Model performance (c-statistic)                              |                     |                             | 0.75 (0.74-0.75)          |

† Mixed effects model with anonymized institution ID as random effect; all other covariates fixed effects.

§ As determined by Elixhauser Comorbidity Enhanced ICD-9-CM/ICD-10 CM Algorithm

\*\* As determined by CKD-EPI formula, indexed by body surface area. Race assumed non-black for patients with race data unavailable.

§ Squared transformation

§§ Square root transformation

§§§ Logarithmic transformation

*ACEI = angiotensin-converting enzyme inhibitor; AIDS = autoimmune deficiency syndrome; AKI = acute kidney injury; ARB = angiotensin II receptor blocker; ASA = American Society of Anesthesiologists; CKD-EPI = Chronic Kidney Disease Epidemiology Collaboration; CPT = Current Procedural Terminology; eGFR = estimated glomerular filtration rate; HIV = human immunodeficiency virus; ICC = intraclass correlation coefficient; KDIGO = Kidney Disease: Improving Global Outcomes; WHO = World Health Organization*

**Supplemental Digital Content 12B: Sensitivity Analysis: Risk of Acute Kidney Injury Associated with**

**Intraoperative Hypotension by Preoperative Risk Quartile – Missing Data Handled via Multiple Imputation**

| Absolute Hypotension - Derivation Cohort                      |                                                    |                                                      |                                                      |                                                      | Adjusted Odds Ratio – Color Scale <sup>†</sup> |
|---------------------------------------------------------------|----------------------------------------------------|------------------------------------------------------|------------------------------------------------------|------------------------------------------------------|------------------------------------------------|
| Intraoperative Hypotension <sup>†</sup> - Absolute MAP Values | Quartile 1* Low Preoperative Risk (N = 22,806)     | Quartile 2* Medium Preoperative Risk (N = 22,802)    | Quartile 3* High Preoperative Risk (N = 22,791)      | Quartile 4* Highest Preoperative Risk (N = 22,793)   |                                                |
| No Absolute Hypotension                                       | (reference)<br>n= 13,614                           | (reference)<br>n= 13,510                             | (reference)<br>n= 12,753                             | (reference)<br>n= 12,319                             | 1.00                                           |
| MAP 60-64 mmHg                                                | 1.04 (0.83-1.30)<br>n= 4,698                       | 1.01 (0.86-1.20)<br>n= 4,677                         | 1.23 (1.09-1.38)<br><b>Increased AKI</b><br>n= 4,860 | 1.15 (1.06-1.16)<br><b>Increased AKI</b><br>n= 4,864 | 1.20                                           |
| MAP 55-59 mmHg                                                | 0.89 (0.67-1.19)<br>n= 2,927                       | 1.30 (1.08-1.57)<br><b>Increased AKI</b><br>n= 2,980 | 1.17 (1.01-1.34)<br><b>Increased AKI</b><br>n= 3,173 | 1.45 (1.32-1.59)<br><b>Increased AKI</b><br>n= 3,308 | 1.40                                           |
| MAP 50-54 mmHg                                                | 1.28 (0.87-1.90)<br>n= 1,049                       | 1.53 (1.16-2.01)<br><b>Increased AKI</b><br>n=1,036  | 1.33 (1.09-1.63)<br><b>Increased AKI</b><br>n= 1,215 | 1.61 (1.41-1.83)<br><b>Increased AKI</b><br>n= 1,349 | 1.60                                           |
| MAP <50 mmHg                                                  | 1.65 (1.02-2.69)<br><b>Increased AKI</b><br>n= 518 | 1.63 (1.16-2.29)<br><b>Increased AKI</b><br>n= 599   | 1.62 (1.29-2.03)<br><b>Increased AKI</b><br>n= 790   | 2.02 (1.74-2.33)<br><b>Increased AKI</b><br>n= 953   | 1.80                                           |
|                                                               |                                                    |                                                      |                                                      |                                                      | 2.00                                           |
|                                                               |                                                    |                                                      |                                                      |                                                      | 2.20                                           |
|                                                               |                                                    |                                                      |                                                      |                                                      | 2.40                                           |
|                                                               |                                                    |                                                      |                                                      |                                                      | 2.60                                           |
|                                                               |                                                    |                                                      |                                                      |                                                      | 2.80                                           |
|                                                               |                                                    |                                                      |                                                      |                                                      | 3.00                                           |

| Relative Hypotension - Derivation Cohort                      |                                                       |                                                       |                                                       |                                                       |
|---------------------------------------------------------------|-------------------------------------------------------|-------------------------------------------------------|-------------------------------------------------------|-------------------------------------------------------|
| Intraoperative Hypotension <sup>†</sup> – Relative MAP Values | Quartile 1* Low Preoperative Risk (N = 22,806)        | Quartile 2* Medium Preoperative Risk (N = 22,802)     | Quartile 3* High Preoperative Risk (N = 22,791)       | Quartile 4* Highest Preoperative Risk (N = 22,793)    |
| No Relative Hypotension                                       | (reference)<br>n= 7,548                               | (reference)<br>n= 7,294                               | (reference)<br>n= 7,263                               | (reference)<br>n= 8,652                               |
| MAP 20-30% Below Baseline                                     | 0.92 (0.73-1.16)<br>n = 5,846                         | 0.92 (0.77-1.09)<br>n = 5,811                         | 0.89 (0.78-1.01)<br>n = 5,678                         | 0.85 (0.78-0.93)<br><b>Decreased AKI</b><br>n = 5,472 |
| MAP 30-40% Below Baseline                                     | 1.00 (0.79-1.26)<br>n = 5,673                         | 0.98 (0.82-1.16)<br>n = 5,671                         | 1.01 (0.89-1.15)<br>n = 5,636                         | 0.88 (0.81-0.97)<br><b>Decreased AKI</b><br>n = 4,899 |
| MAP > 40% Below Baseline                                      | 1.38 (1.08-1.76)<br><b>Increased AKI</b><br>n = 3,739 | 1.33 (1.11-1.59)<br><b>Increased AKI</b><br>n = 4,026 | 1.25 (1.09-1.42)<br><b>Increased AKI</b><br>n = 4,214 | 1.05 (0.95-1.15)<br>n = 3,770                         |

Values presented as adjusted odds ratio and 95% confidence interval.

\* Patients were stratified by risk of postoperative AKI using the full multivariable model.

† Color scale used only for adjusted odds ratios demonstrating statistically significant associations.

Regression within each quartile included all four blood pressure ranges and operative duration (log transformed).

AKI = acute kidney injury; MAP = mean arterial pressure
