# Supplementary material
Source: PubMed Central journal article supplement (PMC7015776)
Supplement: NIHMS1062534-supplement-13.pdf [file NIHMS1062534-supplement-13.pdf]

**Supplemental Digital Content 13A: Subgroup Analysis: Multivariable Analysis of Preoperative Characteristics and Postoperative Acute Kidney Injury – Logistic Regression Full Model<sup>†</sup> Performed on Derivation Cohort Among Cases Receiving General Anesthesia**

| Risk Factor                                                      | $\beta$ Coefficient | Multivariable model p-value | Adjusted Odds Ratio (95% Confidence Interval) <sup>†</sup> |
|------------------------------------------------------------------|---------------------|-----------------------------|------------------------------------------------------------|
| <b>Medical Factors</b>                                           |                     |                             |                                                            |
| Patient Age (years) <sup>§</sup>                                 | 0.0000248           | 0.025                       | 1.00 (1.00-1.00)                                           |
| BMI (kg/m <sup>2</sup> ) <sup>§§</sup>                           | 0.205               | <0.001                      | 1.23 (1.18-1.28)                                           |
| Male Gender                                                      | 0.356               | <0.001                      | 1.43 (1.34-1.52)                                           |
| <b>Patient Medical History <sup>*</sup></b>                      |                     |                             |                                                            |
| Congestive Heart Failure                                         | 0.095               | 0.075                       | 1.10 (0.99-1.22)                                           |
| Cardiac Arrhythmias                                              | 0.171               | <0.001                      | 1.19 (1.09-1.29)                                           |
| Valvular Disease                                                 | -0.008              | 0.904                       | 0.99 (0.87-1.13)                                           |
| Pulmonary Circulation Disorders                                  | 0.143               | 0.026                       | 1.15 (1.02-1.31)                                           |
| Peripheral Vascular Disorders                                    | 0.048               | 0.271                       | 1.05 (0.96-1.14)                                           |
| Hypertension, Uncomplicated                                      | 0.022               | 0.545                       | 1.02 (0.95-1.10)                                           |
| Hypertension, Complicated                                        | 0.495               | <0.001                      | 1.64 (1.47-1.82)                                           |
| Paralysis/Other Neurological Disorders                           | 0.086               | 0.122                       | 1.09 (0.98-1.22)                                           |
| Chronic Pulmonary Disease                                        | -0.012              | 0.779                       | 0.99 (0.91-1.07)                                           |
| Diabetes, Uncomplicated                                          | 0.035               | 0.387                       | 1.04 (0.96-1.12)                                           |
| Diabetes, Complicated                                            | 0.380               | <0.001                      | 1.46 (1.23-1.74)                                           |
| Hypothyroidism                                                   | -0.122              | 0.019                       | 0.89 (0.80-0.98)                                           |
| Liver Disease                                                    | 0.534               | <0.001                      | 1.71 (1.55-1.88)                                           |
| Peptic Ulcer Disease Excluding Bleeding                          | -0.074              | 0.516                       | 0.93 (0.74-1.16)                                           |
| AIDS/HIV                                                         | 0.254               | 0.427                       | 1.29 (0.69-2.41)                                           |
| Rheumatoid Arthritis / Collagen Vascular Diseases                | -0.011              | 0.894                       | 0.99 (0.84-1.16)                                           |
| Coagulopathy                                                     | 0.441               | <0.001                      | 1.55 (1.40-1.72)                                           |
| Lymphoma                                                         | 0.058               | 0.613                       | 1.06 (0.85-1.33)                                           |
| Metastatic Cancer                                                | -0.004              | 0.937                       | 0.99 (0.89-1.11)                                           |
| Solid Tumor                                                      | -0.037              | 0.430                       | 0.96 (0.88-1.06)                                           |
| Weight Loss                                                      | 0.169               | 0.001                       | 1.18 (1.08-1.30)                                           |
| Alcohol Abuse                                                    | -0.149              | 0.055                       | 0.86 (0.74-1.00)                                           |
| Drug Abuse                                                       | -0.055              | 0.570                       | 0.95 (0.78-1.15)                                           |
| Psychoses                                                        | -0.058              | 0.671                       | 0.94 (0.72-1.23)                                           |
| <b>Preoperative Chronic Medications</b>                          |                     |                             |                                                            |
| ACEI/ARB                                                         | 0.039               | 0.410                       | 1.04 (0.95-1.14)                                           |
| Beta Blocker                                                     | 0.014               | 0.750                       | 1.01 (0.93-1.10)                                           |
| Preoperative hemoglobin (g/dL) <sup>§</sup>                      | -0.006              | <0.001                      | 0.99 (0.99-0.99)                                           |
| Preoperative eGFR (mL/min/1.73 m <sup>2</sup> ) <sup>** §</sup>  | -0.00004            | <0.001                      | 0.99 (0.99-0.99)                                           |
| Preinduction Baseline Mean Arterial Pressure (mmHg) <sup>§</sup> | 0.00001             | 0.059                       | 1.00 (1.00-1.00)                                           |
| <b>Surgical Factors</b>                                          |                     |                             |                                                            |
| <b>Surgical Body Region</b>                                      |                     |                             |                                                            |
| Elevated Risk                                                    | 0.920               | <0.001                      | 2.51 (2.26-2.78)                                           |
| Emergent Surgery                                                 | 0.360               | <0.001                      | 1.43 (1.30-1.58)                                           |
| <b>Anesthetic Factors</b>                                        |                     |                             |                                                            |
| <b>ASA Class</b>                                                 |                     |                             |                                                            |
| ASA Class 1                                                      | 0                   |                             | (reference)                                                |
| ASA Class 2                                                      | -0.002              | 0.989                       | 0.99 (0.77-1.30)                                           |
| ASA Class 3                                                      | 0.693               | <0.001                      | 2.00 (1.55-2.59)                                           |
| ASA Class 4                                                      | 1.101               | <0.001                      | 3.01 (2.30-3.92)                                           |
| ASA Class 5                                                      | 1.794               | <0.001                      | 6.01 (4.01-9.01)                                           |
| Expected Anesthesia Duration <sup>§§§</sup>                      | 1.493               | <0.001                      | 4.45 (3.85-5.14)                                           |
| <b>Institutional Factors</b>                                     |                     |                             |                                                            |
| Non-university Hospital (Fixed Effect)                           | 0.080               | 0.655                       | 1.02 (0.76-1.54)                                           |
| Institution (Random Effect), ICC (95% CI)                        |                     |                             | 0.20 (0.11-0.37)                                           |
| Original Model performance (c-statistic)                         |                     |                             | 0.75 (0.74-0.76)                                           |
| New Model performance (c-statistic)                              |                     |                             | 0.76 (0.75-0.76)                                           |

<sup>†</sup> Mixed effects model with anonymized institution ID as random effect; all other covariates fixed effects.

<sup>\*</sup> As determined by Elixhauser Comorbidity Enhanced ICD-9-CM/ICD-10 CM Algorithm

\*\* As determined by CKD-EPI formula, indexed by body surface area. Race assumed non-black for patients with race data unavailable.

§ Squared transformation

§§ Square root transformation

§§§ Logarithmic transformation

*ACEI = angiotensin-converting enzyme inhibitor; AIDS = autoimmune deficiency syndrome; AKI = acute kidney injury; ARB = angiotensin II receptor blocker; ASA = American Society of Anesthesiologists; CKD-EPI = Chronic Kidney Disease Epidemiology Collaboration; CPT = Current Procedural Terminology; eGFR = estimated glomerular filtration rate; HIV = human immunodeficiency virus; ICC = intraclass correlation coefficient; KDIGO = Kidney Disease: Improving Global Outcomes; WHO = World Health Organization*

*Log likelihood = -15,059.97*

## Supplemental Digital Content 13B: Subgroup Analysis: Risk of Acute Kidney Injury Associated with

### Intraoperative Hypotension by Preoperative Risk Quartile – General Anesthesia Cases

| Absolute Hypotension - Derivation Cohort                      |                                                       |                                                       |                                                       |                                                       | Adjusted Odds Ratio – Color Scale <sup>†</sup> |
|---------------------------------------------------------------|-------------------------------------------------------|-------------------------------------------------------|-------------------------------------------------------|-------------------------------------------------------|------------------------------------------------|
| Intraoperative Hypotension <sup>†</sup> - Absolute MAP Values | Quartile 1* Low Preoperative Risk (N = 15,159)        | Quartile 2* Medium Preoperative Risk (N = 15,157)     | Quartile 3* High Preoperative Risk (N = 15,158)       | Quartile 4* Highest Preoperative Risk (N = 15,158)    |                                                |
| No Absolute Hypotension                                       | (reference)<br>n = 8,392                              | (reference)<br>n = 8,392                              | (reference)<br>n = 8,282                              | (reference)<br>n = 7,329                              |                                                |
| MAP 60-64 mmHg                                                | 1.13 (0.85-1.50)<br>n = 3,434                         | 1.21 (0.99-1.48)<br>n = 3,338                         | 1.14 (0.98-1.32)<br>n = 3,371                         | 1.06 (0.95-1.17)<br>n = 3,538                         |                                                |
| MAP 55-59 mmHg                                                | 0.92 (0.64-1.33)<br>n = 2,215                         | 1.36 (1.08-1.71)<br><b>Increased AKI</b><br>n = 2,201 | 1.05 (0.88-1.25)<br>n = 2,213                         | 1.41 (1.27-1.58)<br><b>Increased AKI</b><br>n = 2,561 |                                                |
| MAP 50-54 mmHg                                                | 1.55 (0.98-2.47)<br>n = 763                           | 1.20 (0.83-1.73)<br>n = 806                           | 1.35 (1.05-1.73)<br><b>Increased AKI</b><br>n = 778   | 1.56 (1.33-1.81)<br><b>Increased AKI</b><br>n = 1,027 |                                                |
| MAP <50 mmHg                                                  | 1.43 (0.72-2.82)<br>n = 355                           | 1.47 (0.94-2.29)<br>n = 420                           | 1.82 (1.39-2.38)<br><b>Increased AKI</b><br>n = 514   | 2.04 (1.72-2.43)<br><b>Increased AKI</b><br>n = 703   |                                                |
| Relative Hypotension - Derivation Cohort                      |                                                       |                                                       |                                                       |                                                       |                                                |
| Intraoperative Hypotension <sup>†</sup> – Relative MAP Values | Quartile 1* Low Preoperative Risk (N = 15,159)        | Quartile 2* Medium Preoperative Risk (N = 15,157)     | Quartile 3* High Preoperative Risk (N = 15,158)       | Quartile 4* Highest Preoperative Risk (N = 15,158)    |                                                |
| No Relative Hypotension                                       | (reference)<br>n = 4,115                              | (reference)<br>n = 4,335                              | (reference)<br>n = 4,323                              | (reference)<br>n = 4,931                              |                                                |
| MAP 20-30% Below Baseline                                     | 1.13 (0.82-1.56)<br>n = 4,145                         | 0.99 (0.79-1.24)<br>n = 3,863                         | 0.93 (0.79-1.10)<br>n = 3,913                         | 0.84 (0.75-0.94)<br><b>Decreased AKI</b><br>n = 3,691 |                                                |
| MAP 30-40% Below Baseline                                     | 1.23 (0.89-1.70)<br>n = 4,219                         | 1.06 (0.85-1.32)<br>n = 4,083                         | 1.05 (0.90-1.24)<br>n = 4,048                         | 0.86 (0.77-0.96)<br><b>Decreased AKI</b><br>n = 3,575 |                                                |
| MAP > 40% Below Baseline                                      | 1.91 (1.37-2.66)<br><b>Increased AKI</b><br>n = 2,680 | 1.36 (1.08-1.72)<br><b>Increased AKI</b><br>n = 2,876 | 1.27 (1.07-1.50)<br><b>Increased AKI</b><br>n = 2,874 | 1.03 (0.92-1.15)<br>n = 2,961                         |                                                |

Values presented as adjusted odds ratio and 95% confidence interval.

\* Patients were stratified by risk of postoperative AKI using the full multivariable model.

<sup>†</sup> Color scale used only for adjusted odds ratios demonstrating statistically significant associations.

Regression within each quartile included all four blood pressure ranges and operative duration (log transformed).

AKI = acute kidney injury; MAP = mean arterial pressure
