# Supplementary material
Source: PubMed Central journal article supplement (PMC7015776)
Supplement: NIHMS1062534-supplement-14.pdf [file NIHMS1062534-supplement-14.pdf]

**Supplemental Digital Content 14A: Subgroup Analysis: Multivariable Analysis of Preoperative Characteristics and Postoperative Acute Kidney Injury – Logistic Regression Full Model<sup>†</sup> Performed on Derivation Cohort Among Cases with >20 Minutes of Invasive Arterial Line Blood Pressure Monitoring**

| Risk Factor                                                      | $\beta$ Coefficient | Multivariable model p-value | Adjusted Odds Ratio (95% Confidence Interval) <sup>†</sup> |
|------------------------------------------------------------------|---------------------|-----------------------------|------------------------------------------------------------|
| <b>Medical Factors</b>                                           |                     |                             |                                                            |
| Patient Age (years) <sup>§</sup>                                 | 0.000013            | 0.410                       | 1.00 (1.00-1.00)                                           |
| BMI (kg/m <sup>2</sup> ) <sup>§§</sup>                           | 0.261               | <0.001                      | 1.30 (1.23-1.38)                                           |
| Male Gender                                                      | 0.339               | <0.001                      | 1.40 (1.28-1.54)                                           |
| <b>Patient Medical History <sup>*</sup></b>                      |                     |                             |                                                            |
| Congestive Heart Failure                                         | 0.018               | 0.795                       | 1.02 (0.89-1.16)                                           |
| Cardiac Arrhythmias                                              | 0.098               | 0.082                       | 1.10 (0.99-1.23)                                           |
| Valvular Disease                                                 | 0.006               | 0.942                       | 1.01 (0.86-1.17)                                           |
| Pulmonary Circulation Disorders                                  | 0.128               | 0.128                       | 1.14 (0.96-1.34)                                           |
| Peripheral Vascular Disorders                                    | -0.023              | 0.681                       | 0.98 (0.88-1.09)                                           |
| Hypertension, Uncomplicated                                      | -0.018              | 0.720                       | 0.98 (0.89-1.08)                                           |
| Hypertension, Complicated                                        | 0.472               | <0.001                      | 1.60 (1.39-1.85)                                           |
| Paralysis/Other Neurological Disorders                           | 0.073               | 0.331                       | 1.08 (0.93-1.24)                                           |
| Chronic Pulmonary Disease                                        | 0.013               | 0.819                       | 1.01 (0.91-1.13)                                           |
| Diabetes, Uncomplicated                                          | 0.041               | 0.461                       | 1.04 (0.93-1.16)                                           |
| Diabetes, Complicated                                            | 0.342               | 0.007                       | 1.41 (1.10-1.80)                                           |
| Hypothyroidism                                                   | -0.172              | 0.016                       | 0.84 (0.73-0.97)                                           |
| Liver Disease                                                    | 0.672               | <0.001                      | 1.96 (1.71-2.24)                                           |
| Peptic Ulcer Disease Excluding Bleeding                          | -0.022              | 0.890                       | 0.98 (0.72-1.33)                                           |
| AIDS/HIV                                                         | 0.734               | 0.121                       | 2.08 (0.82-5.28)                                           |
| Rheumatoid Arthritis / Collagen Vascular Diseases                | 0.107               | 0.336                       | 1.11 (0.90-1.38)                                           |
| Coagulopathy                                                     | 0.471               | <0.001                      | 1.60 (1.40-1.83)                                           |
| Lymphoma                                                         | 0.003               | 0.985                       | 1.00 (0.73-1.38)                                           |
| Metastatic Cancer                                                | -0.080              | 0.284                       | 0.92 (0.80-1.07)                                           |
| Solid Tumor                                                      | -0.095              | 0.125                       | 0.91 (0.80-1.03)                                           |
| Weight Loss                                                      | 0.168               | 0.011                       | 1.04 (1.09-1.35)                                           |
| Alcohol Abuse                                                    | -0.283              | 0.011                       | 0.75 (0.61-0.94)                                           |
| Drug Abuse                                                       | -0.118              | 0.434                       | 0.89 (0.66-1.19)                                           |
| Psychoses                                                        | -0.015              | 0.939                       | 0.98 (0.66-1.46)                                           |
| <b>Preoperative Chronic Medications</b>                          |                     |                             |                                                            |
| ACEI/ARB                                                         | 0.032               | 0.606                       | 1.03 (0.92-1.16)                                           |
| Beta Blocker                                                     | -0.018              | 0.753                       | 0.98 (0.88-1.10)                                           |
| Preoperative hemoglobin (g/dL) <sup>§</sup>                      | -0.005              | <0.001                      | 0.99 (0.99-0.99)                                           |
| Preoperative eGFR (mL/min/1.73 m <sup>2</sup> ) <sup>** §</sup>  | -0.00004            | <0.001                      | 0.99 (0.99-0.99)                                           |
| Preinduction Baseline Mean Arterial Pressure (mmHg) <sup>§</sup> | 0.00001             | 0.735                       | 1.00 (1.00-1.00)                                           |
| <b>Surgical Factors</b>                                          |                     |                             |                                                            |
| <b>Surgical Body Region</b>                                      |                     |                             |                                                            |
| Elevated Risk                                                    | 1.24                | <0.001                      | 3.46 (3.00-3.99)                                           |
| Emergent Surgery                                                 | 0.354               | <0.001                      | 1.43 (1.25-1.62)                                           |
| <b>Anesthetic Factors</b>                                        |                     |                             |                                                            |
| <b>ASA Class</b>                                                 |                     |                             |                                                            |
| ASA Class 1                                                      | 0                   |                             | (reference)                                                |
| ASA Class 2                                                      | -0.036              | 0.885                       | 0.96 (0.59-1.58)                                           |
| ASA Class 3                                                      | 0.472               | 0.053                       | 1.60 (0.99-2.59)                                           |
| ASA Class 4                                                      | 0.083               | <0.001                      | 2.37 (1.46-3.85)                                           |
| ASA Class 5                                                      | 1.534               | <0.001                      | 4.64 (2.60-8.26)                                           |
| Expected Anesthesia Duration <sup>§§§</sup>                      | 1.322               | <0.001                      | 3.75 (3.03-4.65)                                           |
| General Anesthesia                                               | 0.295               | <0.001                      | 1.84 (1.23-1.47)                                           |
| <b>Institutional Factors</b>                                     |                     |                             |                                                            |
| Non-university Hospital (Fixed Effect)                           | -0.043              | 0.841                       | 0.96 (0.63-1.45)                                           |
| Institution (Random Effect), ICC (95% CI)                        |                     |                             | 0.21 (0.11-0.39)                                           |
| Original Model performance (c-statistic)                         |                     |                             | 0.75 (0.74-0.76)                                           |
| New Model performance (c-statistic)                              |                     |                             | 0.76 (0.75-0.77)                                           |

<sup>†</sup> Mixed effects model with anonymized institution ID as random effect; all other covariates fixed effects.

\* As determined by Elixhauser Comorbidity Enhanced ICD-9-CM/ICD-10 CM Algorithm

\*\* As determined by CKD-EPI formula, indexed by body surface area. Race assumed non-black for patients with race data unavailable.

§ Squared transformation

§§ Square root transformation

§§§ Logarithmic transformation

*ACEI = angiotensin-converting enzyme inhibitor; AIDS = autoimmune deficiency syndrome; AKI = acute kidney injury; ARB = angiotensin II receptor blocker; ASA = American Society of Anesthesiologists; CKD-EPI = Chronic Kidney Disease Epidemiology Collaboration; CPT = Current Procedural Terminology; eGFR = estimated glomerular filtration rate; HIV = human immunodeficiency virus; ICC = intraclass correlation coefficient; KDIGO = Kidney Disease: Improving Global Outcomes; WHO = World Health Organization*

*Log likelihood = -7,374.45*

**Supplemental Digital Content 14B: Subgroup Analysis: Risk of Acute Kidney Injury Associated with Intraoperative Hypotension by Preoperative Risk Quartile – Cases with >20 Minutes of Invasive Arterial Line Blood Pressure Monitoring**

Adjusted Odds Ratio – Color Scale<sup>†</sup>

| Absolute Hypotension - Derivation Cohort                      |                                                     |                                                        |                                                      |                                                         |
|---------------------------------------------------------------|-----------------------------------------------------|--------------------------------------------------------|------------------------------------------------------|---------------------------------------------------------|
| Intraoperative Hypotension <sup>†</sup> - Absolute MAP Values | Quartile 1*<br>Low Preoperative Risk<br>(N = 6,061) | Quartile 2*<br>Medium Preoperative Risk<br>(N = 6,060) | Quartile 3*<br>High Preoperative Risk<br>(N = 6,060) | Quartile 4*<br>Highest Preoperative Risk<br>(N = 6,060) |
| No Absolute Hypotension                                       | (reference)<br>n = 3,089                            | (reference)<br>n = 3,204                               | (reference)<br>n = 3,086                             | (reference)<br>n = 2,685                                |
| MAP 60-64 mmHg                                                | 1.03 (0.68-1.54)<br>n = 1,616                       | 1.26 (0.98-1.61)<br>n = 1,493                          | 0.95 (0.78-1.16)<br>n = 1,507                        | 1.19 (1.03-1.38)<br>n = 1,498                           |
| MAP 55-59 mmHg                                                | 1.18 (0.72-1.93)<br>n = 925                         | 1.10 (0.80-1.50)<br>n = 892                            | 1.13 (0.90-1.42)<br>n = 956                          | 1.48 (1.26-1.73)<br><b>Increased AKI</b><br>n = 1,123   |
| MAP 50-54 mmHg                                                | 1.49 (0.73-3.03)<br>n = 313                         | 0.82 (0.47-1.43)<br>n = 298                            | 1.44 (1.04-2.00)<br><b>Increased AKI</b><br>n = 320  | 1.73 (1.39-2.14)<br><b>Increased AKI</b><br>n = 460     |
| MAP <50 mmHg                                                  | 1.77 (0.63-4.98)<br>n = 118                         | 1.79 (1.06-3.02)<br><b>Increased AKI</b><br>n = 173    | 1.94 (1.33-2.83)<br><b>Increased AKI</b><br>n = 191  | 2.43 (1.89-3.13)<br><b>Increased AKI</b><br>n = 294     |

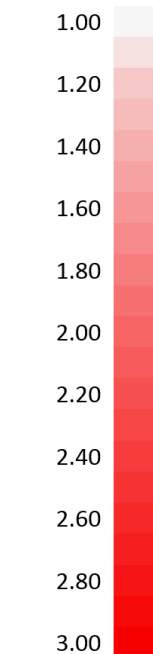

| Relative Hypotension - Derivation Cohort                      |                                                       |                                                        |                                                       |                                                         |
|---------------------------------------------------------------|-------------------------------------------------------|--------------------------------------------------------|-------------------------------------------------------|---------------------------------------------------------|
| Intraoperative Hypotension <sup>†</sup> – Relative MAP Values | Quartile 1*<br>Low Preoperative Risk<br>(N = 6,061)   | Quartile 2*<br>Medium Preoperative Risk<br>(N = 6,060) | Quartile 3*<br>High Preoperative Risk<br>(N = 6,060)  | Quartile 4*<br>Highest Preoperative Risk<br>(N = 6,060) |
| No Relative Hypotension                                       | (reference)<br>n = 1,355                              | (reference)<br>n = 1,523                               | (reference)<br>n = 1,558                              | (reference)<br>n = 2,094                                |
| MAP 20-30% Below Baseline                                     | 1.17 (0.69-2.00)<br>n = 1,476                         | 0.98 (0.73-1.32)<br>n = 1,471                          | 0.88 (0.70-1.10)<br>n = 1,553                         | 0.81 (0.69-0.94)<br><b>Decreased AKI</b><br>n = 1,419   |
| MAP 30-40% Below Baseline                                     | 1.54 (0.94-2.51)<br>n = 1,863                         | 1.04 (0.78-1.38)<br>n = 1,746                          | 1.00 (0.80-1.25)<br>n = 1,641                         | 0.83 (0.71-0.98)<br><b>Decreased AKI</b><br>n = 1,358   |
| MAP > 40% Below Baseline                                      | 2.17 (1.32-3.57)<br><b>Increased AKI</b><br>n = 1,367 | 1.15 (0.85-1.56)<br>n = 1,320                          | 1.22 (0.97-1.53)<br><b>Increased AKI</b><br>n = 1,308 | 0.98 (0.83-1.16)<br>n = 1,189                           |

Values presented as adjusted odds ratio and 95% confidence interval.

\* Patients were stratified by risk of postoperative AKI using the full multivariable model.

† Color scale used only for adjusted odds ratios demonstrating statistically significant associations.

Regression within each quartile included all four blood pressure ranges and operative duration (log transformed).

AKI = acute kidney injury; MAP = mean arterial pressure
