# Supplementary material
Source: PubMed Central journal article supplement (PMC7015776)
Supplement: NIHMS1062534-supplement-15.pdf [file NIHMS1062534-supplement-15.pdf]

**Supplemental Digital Content 15A: Subgroup Analysis: Multivariable Analysis of Preoperative Characteristics and Postoperative Acute Kidney Injury – Logistic Regression Full Model<sup>†</sup> Performed on Derivation Cohort Among High Risk Surgical Cases<sup>‡</sup>**

| Risk Factor                                                      | $\beta$ Coefficient | Multivariable model p-value | Adjusted Odds Ratio (95% Confidence Interval) <sup>†</sup> |
|------------------------------------------------------------------|---------------------|-----------------------------|------------------------------------------------------------|
| <b>Medical Factors</b>                                           |                     |                             |                                                            |
| Patient Age (years) <sup>§</sup>                                 | 0.00007             | <0.002                      | 1.00 (1.00-1.00)                                           |
| BMI (kg/m <sup>2</sup> ) <sup>§§</sup>                           | 0.274               | <0.001                      | 1.32 (1.24-1.40)                                           |
| Male Gender                                                      | 0.482               | <0.001                      | 1.62 (1.47-1.78)                                           |
| <b>Patient Medical History<sup>*</sup></b>                       |                     |                             |                                                            |
| Congestive Heart Failure                                         | -0.050              | 0.564                       | 0.95 (0.80-1.13)                                           |
| Cardiac Arrhythmias                                              | 0.191               | 0.002                       | 1.21 (1.07-1.37)                                           |
| Valvular Disease                                                 | 0.114               | 0.243                       | 1.12 (0.93-1.36)                                           |
| Pulmonary Circulation Disorders                                  | 0.166               | 0.097                       | 1.18 (0.97-1.44)                                           |
| Peripheral Vascular Disorders                                    | 0.125               | 0.045                       | 1.13 (1.00-1.28)                                           |
| Hypertension, Uncomplicated                                      | 0.049               | 0.361                       | 1.05 (0.95-1.17)                                           |
| Hypertension, Complicated                                        | 0.491               | <0.001                      | 1.63 (1.38-1.93)                                           |
| Paralysis/Other Neurological Disorders                           | -0.061              | 0.513                       | 0.94 (0.78-1.13)                                           |
| Chronic Pulmonary Disease                                        | 0.079               | 0.173                       | 1.08 (0.97-1.21)                                           |
| Diabetes, Uncomplicated                                          | 0.036               | 0.548                       | 1.04 (0.92-1.17)                                           |
| Diabetes, Complicated                                            | 0.410               | 0.007                       | 1.51 (1.12-2.03)                                           |
| Hypothyroidism                                                   | -0.182              | 0.018                       | 0.83 (0.72-0.97)                                           |
| Liver Disease                                                    | 0.590               | <0.001                      | 1.80 (1.57-2.08)                                           |
| Peptic Ulcer Disease Excluding Bleeding                          | -0.091              | 0.568                       | 0.91 (0.67-1.25)                                           |
| AIDS/HIV                                                         | 0.824               | 0.079                       | 2.28 (0.91-5.71)                                           |
| Rheumatoid Arthritis / Collagen Vascular Diseases                | -0.091              | 0.459                       | 0.91 (0.71-1.16)                                           |
| Coagulopathy                                                     | 0.454               | <0.001                      | 1.58 (1.34-1.85)                                           |
| Lymphoma                                                         | 0.011               | 0.951                       | 1.01 (0.72-1.43)                                           |
| Metastatic Cancer                                                | 0.026               | 0.715                       | 1.03 (0.89-1.18)                                           |
| Solid Tumor                                                      | 0.192               | 0.002                       | 1.21 (1.08-1.37)                                           |
| Weight Loss                                                      | 0.328               | <0.001                      | 1.39 (1.21-1.59)                                           |
| Alcohol Abuse                                                    | 0.100               | 0.406                       | 1.10 (0.87-1.40)                                           |
| Drug Abuse                                                       | -0.102              | 0.521                       | 0.90 (0.66-1.23)                                           |
| Psychoses                                                        | 0.086               | 0.690                       | 1.09 (0.71-1.66)                                           |
| <b>Preoperative Chronic Medications</b>                          |                     |                             |                                                            |
| ACEI/ARB                                                         | -0.016              | 0.807                       | 0.98 (0.86-1.12)                                           |
| Beta Blocker                                                     | 0.055               | 0.376                       | 1.06 (0.93-1.20)                                           |
| Preoperative hemoglobin (g/dL) <sup>§</sup>                      | -0.006              | <0.001                      | 0.99 (0.99-0.99)                                           |
| Preoperative eGFR (mL/min/1.73 m <sup>2</sup> ) <sup>§§</sup>    | -0.00004            | <0.001                      | 1.00 (1.00-1.00)                                           |
| Preinduction Baseline Mean Arterial Pressure (mmHg) <sup>§</sup> | 0.000005            | 0.489                       | 1.00 (1.00-1.00)                                           |
| <b>Surgical Factors</b>                                          |                     |                             |                                                            |
| Emergent Surgery                                                 | 0.411               | <0.001                      | 1.51 (1.31-1.74)                                           |
| <b>Anesthetic Factors</b>                                        |                     |                             |                                                            |
| <b>ASA Class</b>                                                 |                     |                             |                                                            |
| ASA Class 1                                                      | 0                   |                             | (reference)                                                |
| ASA Class 2                                                      | -0.108              | 0.572                       | 0.90 (0.62-1.31)                                           |
| ASA Class 3                                                      | 0.370               | 0.050                       | 1.45 (1.00-2.09)                                           |
| ASA Class 4                                                      | 0.776               | <0.001                      | 2.17 (1.48-3.19)                                           |
| ASA Class 5                                                      | 1.633               | <0.001                      | 5.12 (3.02-8.68)                                           |
| Expected Anesthesia Duration <sup>§§§</sup>                      | 2.053               | <0.001                      | 7.79 (6.18-9.82)                                           |
| General Anesthesia                                               | 0.291               | 0.285                       | 1.34 (0.78-2.28)                                           |
| <b>Institutional Factors</b>                                     |                     |                             |                                                            |
| Non-university Hospital (Fixed Effect)                           | 0.262               | 0.282                       | 1.30 (0.81-2.09)                                           |
| Institution (Random Effect), ICC (95% CI)                        |                     |                             | 0.26 (0.14-0.47)                                           |
| Original Model performance (c-statistic)                         |                     |                             | 0.75 (0.74-0.76)                                           |
| New Model performance (c-statistic)                              |                     |                             | 0.76 (0.75-0.77)                                           |

<sup>‡</sup> Defined as intraperitoneal, intrathoracic, and suprainguinal vascular procedures.

<sup>†</sup> Mixed effects model with anonymized institution ID as random effect; all other covariates fixed effects.

<sup>\*</sup> As determined by Elixhauser Comorbidity Enhanced ICD-9-CM/ICD-10 CM Algorithm

\*\* As determined by CKD-EPI formula, indexed by body surface area. Race assumed non-black for patients with race data unavailable.

§ Squared transformation

§§ Square root transformation

§§§ Logarithmic transformation

*ACEI = angiotensin-converting enzyme inhibitor; AIDS = autoimmune deficiency syndrome; AKI = acute kidney injury; ARB = angiotensin II receptor blocker; ASA = American Society of Anesthesiologists; CKD-EPI = Chronic Kidney Disease Epidemiology Collaboration; CPT = Current Procedural Terminology; eGFR = estimated glomerular filtration rate; HIV = human immunodeficiency virus; ICC = intraclass correlation coefficient; KDIGO = Kidney Disease: Improving Global Outcomes; WHO = World Health Organization*

*Log likelihood = -7043.95*

## Supplemental Digital Content 15B: Subgroup Analysis: Risk of Acute Kidney Injury Associated with

### Intraoperative Hypotension by Preoperative Risk Quartile – High Risk Cases<sup>‡</sup>

| Absolute Hypotension - Derivation Cohort                      |                                               |                                                     |                                                       |                                                       | Adjusted Odds Ratio – Color Scale <sup>†</sup> |
|---------------------------------------------------------------|-----------------------------------------------|-----------------------------------------------------|-------------------------------------------------------|-------------------------------------------------------|------------------------------------------------|
| Intraoperative Hypotension <sup>†</sup> - Absolute MAP Values | Quartile 1* Low Preoperative Risk (N = 6,525) | Quartile 2* Medium Preoperative Risk (N = 6,524)    | Quartile 3* High Preoperative Risk (N = 6,524)        | Quartile 4* Highest Preoperative Risk (N = 6,524)     |                                                |
| No Absolute Hypotension                                       | (reference)<br>n = 3,933                      | (reference)<br>n = 3,687                            | (reference)<br>n = 3,449                              | (reference)<br>n = 2,705                              |                                                |
| MAP 60-64 mmHg                                                | 1.18 (0.78-1.76)<br>n = 1,391                 | 1.15 (0.85-1.57)<br>n = 1,482                       | 1.25 (1.01-1.54)<br><b>Increased AKI</b><br>n = 1,567 | 0.98 (0.84-1.14)<br>n = 1,702                         |                                                |
| MAP 55-59 mmHg                                                | 0.91 (0.52-1.60)<br>n = 797                   | 1.44 (1.03-2.01)<br><b>Increased AKI</b><br>n = 953 | 1.23 (0.96-1.57)<br>n = 1,002                         | 1.35 (1.15-1.57)<br><b>Increased AKI</b><br>n = 1,287 |                                                |
| MAP 50-54 mmHg                                                | 1.81 (0.93-3.55)<br>n = 274                   | 1.37 (0.78-2.41)<br>n = 277                         | 2.05 (1.47-2.86)<br><b>Increased AKI</b><br>n = 322   | 1.61 (1.30-1.98)<br><b>Increased AKI</b><br>n = 515   |                                                |
| MAP <50 mmHg                                                  | 1.13 (0.35-3.63)<br>n = 130                   | 2.73 (1.47-5.08)<br><b>Increased AKI</b><br>n = 125 | 1.88 (1.22-2.90)<br><b>Increased AKI</b><br>n = 184   | 2.00 (1.56-2.57)<br><b>Increased AKI</b><br>n = 315   |                                                |

  

| Relative Hypotension - Derivation Cohort                      |                                                     |                                                       |                                                       |                                                       |
|---------------------------------------------------------------|-----------------------------------------------------|-------------------------------------------------------|-------------------------------------------------------|-------------------------------------------------------|
| Intraoperative Hypotension <sup>†</sup> – Relative MAP Values | Quartile 1* Low Preoperative Risk (N = 6,525)       | Quartile 2* Medium Preoperative Risk (N = 6,524)      | Quartile 3* High Preoperative Risk (N = 6,524)        | Quartile 4* Highest Preoperative Risk (N = 6,524)     |
| No Relative Hypotension                                       | (reference)<br>n = 1,993                            | (reference)<br>n = 1,678                              | (reference)<br>n = 1,595                              | (reference)<br>n = 1,762                              |
| MAP 20-30% Below Baseline                                     | 1.21 (0.77-1.89)<br>n = 1,835                       | 1.11 (0.78-1.58)<br>n = 1,727                         | 0.85 (0.66-1.09)<br>n = 1,618                         | 0.81 (0.68-0.95)<br><b>Decreased AKI</b><br>n = 1,552 |
| MAP 30-40% Below Baseline                                     | 1.40 (0.89-2.19)<br>n = 1,750                       | 1.35 (0.97-1.90)<br>n = 1,873                         | 1.09 (0.86-1.38)<br>n = 1,932                         | 0.82 (0.70-0.97)<br><b>Decreased AKI</b><br>n = 1,686 |
| MAP > 40% Below Baseline                                      | 1.88 (1.15-3.09)<br><b>Increased AKI</b><br>n = 947 | 1.69 (1.18-2.41)<br><b>Increased AKI</b><br>n = 1,246 | 1.29 (1.01-1.66)<br><b>Increased AKI</b><br>n = 1,379 | 1.00 (0.85-1.18)<br>n = 1,524                         |

Values presented as adjusted odds ratio and 95% confidence interval.

<sup>‡</sup> Defined as intraperitoneal, intrathoracic, and suprainguinal vascular procedures.

\* Patients were stratified by risk of postoperative AKI using the full multivariable model.

<sup>†</sup> Color scale used only for adjusted odds ratios demonstrating statistically significant associations.

Regression within each quartile included all four blood pressure ranges and operative duration (log transformed).

AKI = acute kidney injury; MAP = mean arterial pressure
